# Supplementary material for: Multi-omic rejuvenation of human cells by maturation phase transient reprogramming
Source: eLife journal article supplement (doi:10.7554/elife.71624), 2022-04-07
Supplement: supp [file elife-71624-supp-v1.zip]

Archive with 8 entries (8 files):
- elife_poa_e71624_Transparent_Reporting_File.docx
- elife_poa_e71624_Figure_1_figure_supplement_1.pdf
- elife_poa_e71624_Figure_2_figure_supplement_1.pdf
- elife_poa_e71624_Figure_3_figure_supplement_1.pdf
- elife_poa_e71624_Figure_4_figure_supplement_1.pdf
- elife_poa_e71624_Supplementary_file_1.xlsx
- elife_poa_e71624_Supplementary_file_2.xlsx
- elife_poa_e71624_Supplementary_file_3.xlsx
