# Supplementary material for: Multi-omic rejuvenation of human cells by maturation phase transient reprogramming
Source: eLife journal article supplement (doi:10.7554/elife.71624), 2022-04-07

**a**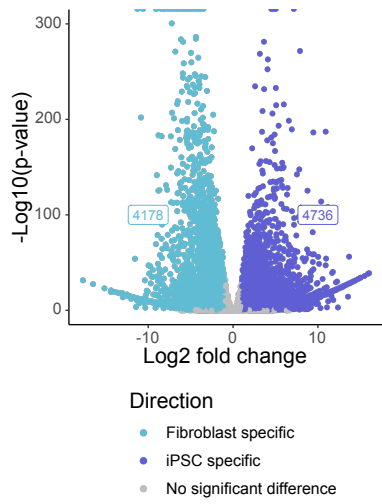**b** Fibroblast specific genes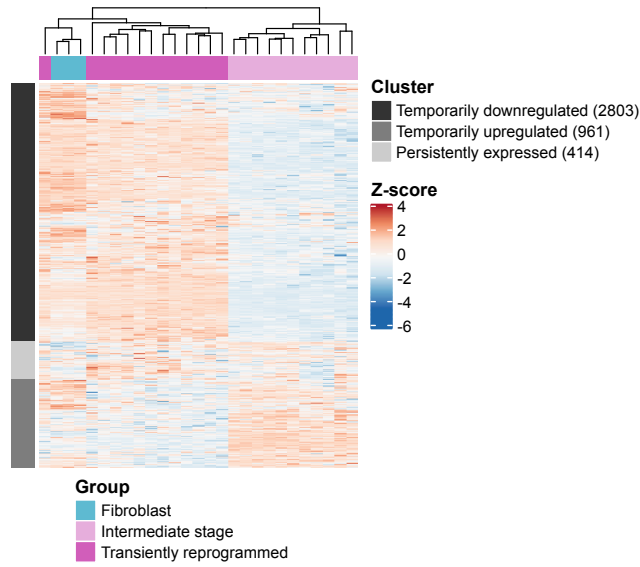**c** iPSC specific genes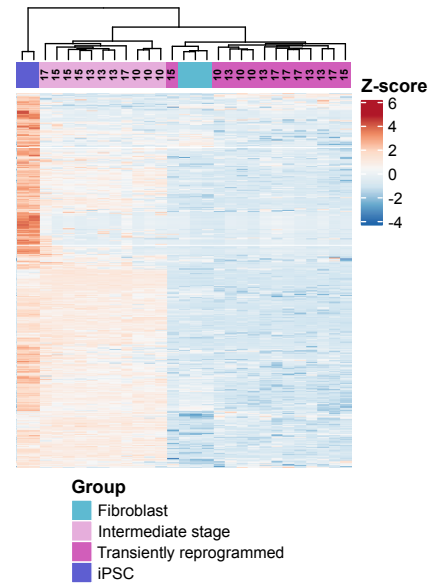**d**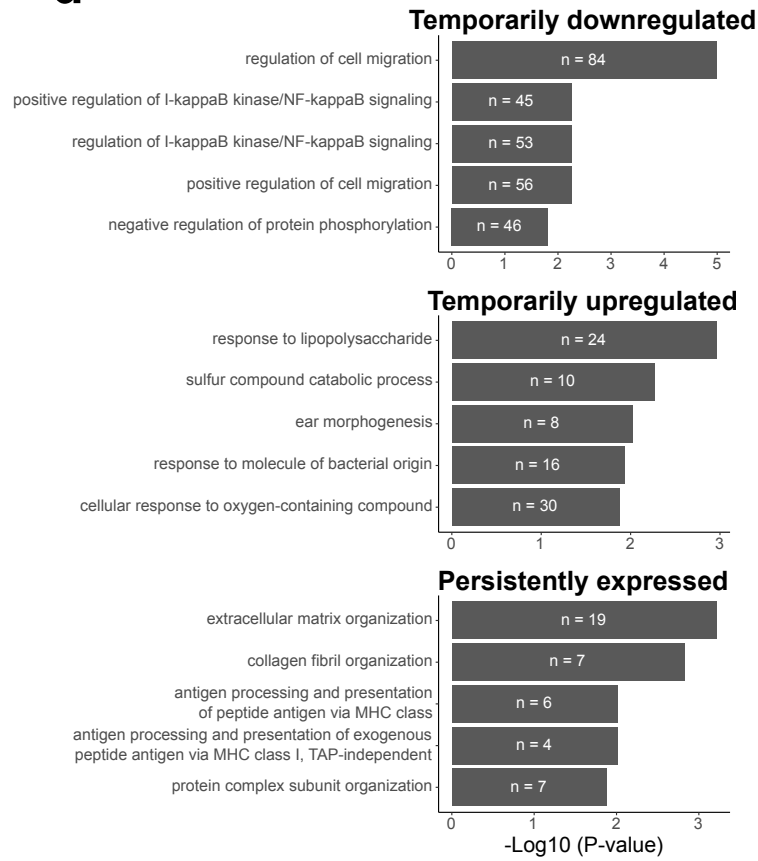**e**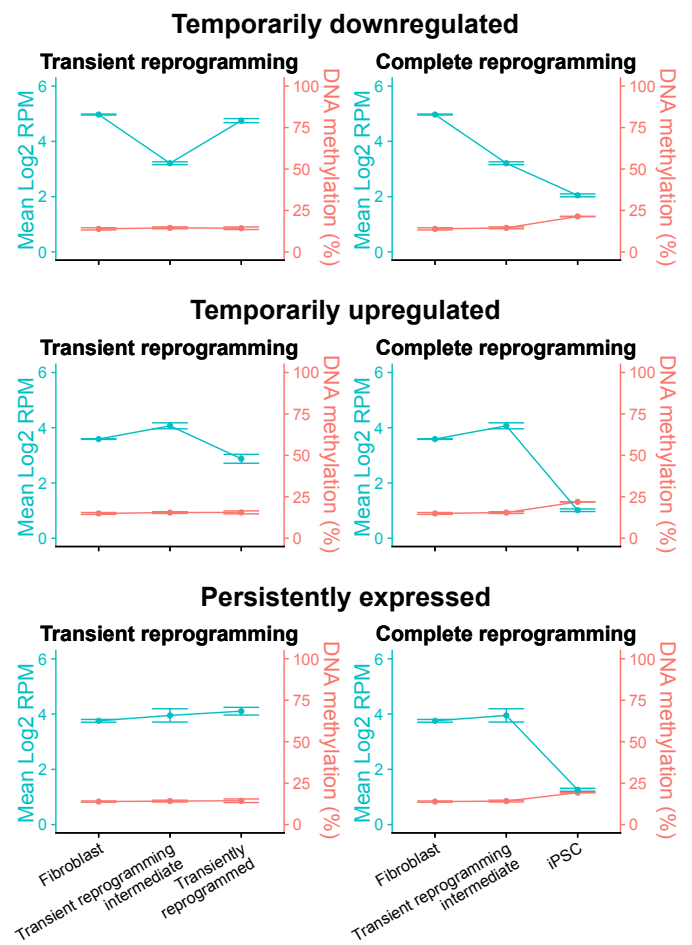**f**

Enhancers of downregulated genes

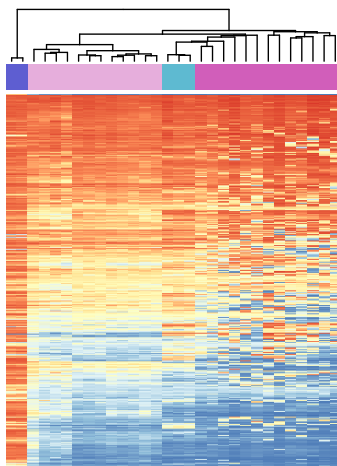

Enhancers of upregulated genes

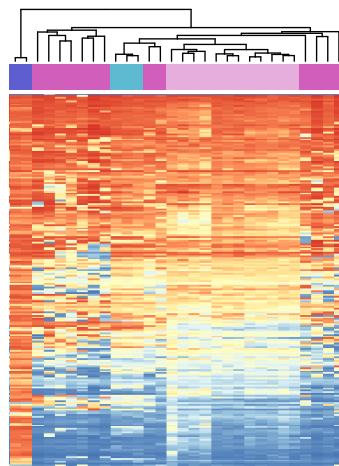

Enhancers of persistent genes

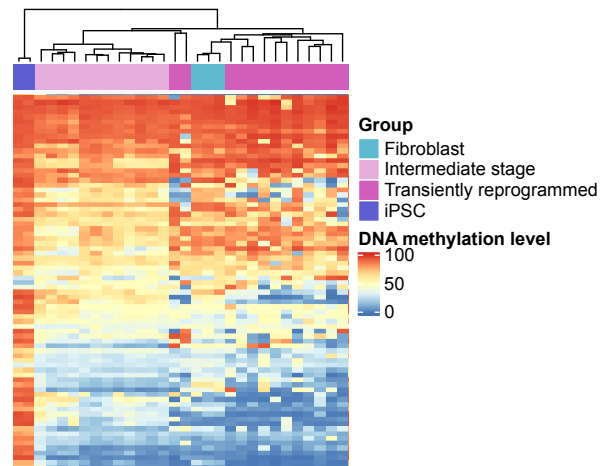

Supplement: supp [file elife-71624-supp-v1.zip]
