# Supplementary material for: Multi-omic rejuvenation of human cells by maturation phase transient reprogramming
Source: eLife journal article supplement (doi:10.7554/elife.71624), 2022-04-07
Supplement: supp [file elife-71624-supp-v1.zip › elife_poa_e71624_Supplementary_file_1.xlsx]

## Sheet: Sheet1
Study	Design	Length of reprogramming factors expression	Length of recovery phase	Reprogramming phase achieved	Transient	Cell types/tissues	Outcomes
Ocampo et al (2016)	Transgenic mouse carrying doxycycline inducible reprogramming cassette (OSKM)	2 days	5 days	Initiation	Yes	Multiple tissues	Increases lifespan in progeroid mice, restores global levels of some histone modifcations such as H3K9me3 in both progeroid and wild type mice, improves recovery after pancreatic or muscle injury in wild type mice.
Sarkar et al (2020)	Transfecting mRNAs encoding OSKMNL into human cells	4 days	2 days	Initiation	Yes	Fibroblasts, endothelial cells and chondrocytes	Reverses age-associated transcription changes in fibroblasts and endothelial cells, reduces epigenetic age by approximately 3 years in fibroblasts and 5 years in endothelial cells, reverses other age-associated changes such as heterochromatin marks and organelle function. Reverses features of disease in osteoarthritic chondrocytes.
Lu et al (2020)	Adeno-associated viruses encoding doxycycline regulated (Tet-on or Tet-off) polycistronic OSK injected into vitreous body of mice or provided to human neurons	2-4 weeks (mouse), 9 days (human)	N/A	N/A, features of pluripotency are not achieved with this system	No	Mouse optic nerve and human neurons	Treatment promotes axon growth after optic nerve injury, restores vision in a glaucoma model mouse, reverses age-associated transcription changes in old mice, partially reverses DNA methylation ageing signature in mouse retinal ganglion cells and reverses DNA methylation age by 0.2 years in human neurons.
