# Supplementary material for: Multi-omic rejuvenation of human cells by maturation phase transient reprogramming
Source: eLife journal article supplement (doi:10.7554/elife.71624), 2022-04-07
Supplement: supp [file elife-71624-supp-v1.zip › elife_poa_e71624_Supplementary_file_2.xlsx]

## Sheet: Tukey_Statistics_morphology_plo
Comparison	Difference	Lower end point	Upper end point	Adjusted P value
FTR Intermediate-FTR End	-1.10948	-1.37579	-0.843174	0
NC End-FTR End	0.074424	-0.173909	0.322757	0.974614
NC Intermediate-FTR End	-0.632276	-0.886265	-0.378287	0
TR End-FTR End	-0.172975	-0.428093	0.0821438	0.412503
TR Intermediate-FTR End	-1.84785	-2.1243	-1.57139	0
Start-FTR End	-0.396397	-0.706105	-0.0866893	0.00315816
NC End-FTR Intermediate	1.18391	0.919914	1.4479	0
NC Intermediate-FTR Intermediate	0.477207	0.207887	0.746526	4.40509e-06
TR End-FTR Intermediate	0.936508	0.666122	1.20689	0
TR Intermediate-FTR Intermediate	-0.738364	-1.02897	-0.44776	0
Start-FTR Intermediate	0.713085	0.390685	1.03549	0
NC Intermediate-NC End	-0.7067	-0.958259	-0.455141	0
TR End-NC End	-0.247399	-0.500098	0.00530071	0.0595258
TR Intermediate-NC End	-1.92227	-2.1965	-1.64804	0
Start-NC End	-0.470821	-0.77854	-0.163103	0.000143884
TR End-NC Intermediate	0.459301	0.201041	0.717561	3.9822e-06
TR Intermediate-NC Intermediate	-1.21557	-1.49493	-0.936213	0
Start-NC Intermediate	0.235878	-0.0764224	0.548179	0.279003
TR Intermediate-TR End	-1.67487	-1.95526	-1.39449	0
Start-TR End	-0.223423	-0.536643	0.0897975	0.348327
Start-TR Intermediate	1.45145	1.12062	1.78228	0
Abbreviations key:
TR - Transiently reprogrammed
FTR - Failed to transiently reprogram
NC - Negative control
