# Supplementary material for: Multi-omic rejuvenation of human cells by maturation phase transient reprogramming
Source: eLife journal article supplement (doi:10.7554/elife.71624), 2022-04-07
Supplement: supp [file elife-71624-supp-v1.zip › elife_poa_e71624_Supplementary_file_3.xlsx]

## Sheet: Temporarily downregulated
Gene	ID
A1BG	ENSG00000121410
A1BG-AS1	ENSG00000268895
AAED1	ENSG00000158122
AAK1	ENSG00000115977
AAMDC	ENSG00000087884
ABCA5	ENSG00000154265
ABCA6	ENSG00000154262
ABCA8	ENSG00000141338
ABCA9	ENSG00000154258
ABCB10	ENSG00000135776
ABCC3	ENSG00000108846
ABCC9	ENSG00000069431
ABHD11-AS1	ENSG00000225969
ABHD14B	ENSG00000114779
ABHD15	ENSG00000168792
ABHD2	ENSG00000140526
ABHD5	ENSG00000011198
ABI1	ENSG00000136754
ABI3BP	ENSG00000154175
ABL2	ENSG00000143322
ABLIM3	ENSG00000173210
AC002066.1	ENSG00000237813
AC002398.12	ENSG00000267328
AC002401.1	ENSG00000236472
AC002985.3	ENSG00000268193
AC003075.4	ENSG00000237773
AC003092.1	ENSG00000236453
AC004381.6	ENSG00000005189
AC005262.2	ENSG00000267688
AC005262.3	ENSG00000267139
AC005339.2	ENSG00000268565
AC005540.3	ENSG00000235852
AC005592.2	ENSG00000231185
AC005789.11	ENSG00000267473
AC005932.1	ENSG00000269019
AC006369.2	ENSG00000236213
AC006547.15	ENSG00000268292
AC007040.11	ENSG00000258881
AC007098.1	ENSG00000226605
AC007308.7	ENSG00000272600
AC007620.3	ENSG00000242539
AC007750.5	ENSG00000236841
AC007879.7	ENSG00000229647
AC008440.5	ENSG00000232220
AC009501.4	ENSG00000231609
AC010226.4	ENSG00000249249
AC010894.5	ENSG00000237798
AC012513.6	ENSG00000231092
AC012531.25	ENSG00000260597
AC012613.2	ENSG00000253406
AC016722.4	ENSG00000228925
AC016999.2	ENSG00000229915
AC018464.3	ENSG00000234520
AC037459.4	ENSG00000248235
AC068533.7	ENSG00000249319
AC093110.3	ENSG00000238018
AC093484.4	ENSG00000239203
AC113189.5	ENSG00000233223
AC114494.1	ENSG00000279468
AC142528.1	ENSG00000235078
AC144831.1	ENSG00000261888
AC145676.2	ENSG00000249852
AC253572.1	ENSG00000278882
ACBD5	ENSG00000107897
ACE	ENSG00000159640
ACKR4	ENSG00000129048
ACOT9	ENSG00000123130
ACOX2	ENSG00000168306
ACOX3	ENSG00000087008
ACSL1	ENSG00000151726
ACSL4	ENSG00000068366
ACSL5	ENSG00000197142
ACSS2	ENSG00000131069
ACTN1	ENSG00000072110
ACTN4	ENSG00000130402
ACTR2	ENSG00000138071
ACTR3	ENSG00000115091
ACVRL1	ENSG00000139567
ADAM12	ENSG00000148848
ADAM8	ENSG00000151651
ADAM9	ENSG00000168615
ADAMTS1	ENSG00000154734
ADAMTS2	ENSG00000087116
ADAMTS4	ENSG00000158859
ADAMTS6	ENSG00000049192
ADAMTSL1	ENSG00000178031
ADAMTSL4	ENSG00000143382
ADAMTSL4-AS1	ENSG00000203804
ADAMTSL5	ENSG00000185761
ADCK2	ENSG00000133597
ADCY7	ENSG00000121281
ADCY9	ENSG00000162104
ADD1	ENSG00000087274
ADI1	ENSG00000182551
ADIRF	ENSG00000148671
ADIRF-AS1	ENSG00000272734
ADK	ENSG00000156110
ADM	ENSG00000148926
ADPRHL1	ENSG00000153531
ADRA1B	ENSG00000170214
ADRA1D	ENSG00000171873
ADRB2	ENSG00000169252
ADTRP	ENSG00000111863
AEBP1	ENSG00000106624
AF127936.7	ENSG00000235609
AF230666.2	ENSG00000223697
AGA	ENSG00000038002
AGAP11	ENSG00000271880
AGAP2	ENSG00000135439
AGAP2-AS1	ENSG00000255737
AGPAT2	ENSG00000169692
AGPAT3	ENSG00000160216
AGPAT9	ENSG00000138678
AGTR1	ENSG00000144891
AHNAK	ENSG00000124942
AHNAK2	ENSG00000185567
AHR	ENSG00000106546
AHRR	ENSG00000063438
AK1	ENSG00000106992
AK3	ENSG00000147853
AK5	ENSG00000154027
AKAP11	ENSG00000023516
AKAP2	ENSG00000241978
AKAP6	ENSG00000151320
AKT1	ENSG00000142208
AKT3	ENSG00000117020
AKTIP	ENSG00000166971
ALAD	ENSG00000148218
ALCAM	ENSG00000170017
ALDH1A3	ENSG00000184254
ALDH3B1	ENSG00000006534
ALG14	ENSG00000172339
ALPK1	ENSG00000073331
ALPK2	ENSG00000198796
AMFR	ENSG00000159461
AMOT	ENSG00000126016
AMOTL2	ENSG00000114019
AMPD3	ENSG00000133805
ANAPC13	ENSG00000129055
ANG	ENSG00000214274
ANGPTL4	ENSG00000167772
ANKMY2	ENSG00000106524
ANKRD13A	ENSG00000076513
ANKRD2	ENSG00000165887
ANKRD42	ENSG00000137494
ANKRD54	ENSG00000100124
ANLN	ENSG00000011426
ANO3	ENSG00000134343
ANPEP	ENSG00000166825
ANTXR1	ENSG00000169604
ANTXR2	ENSG00000163297
ANXA1	ENSG00000135046
ANXA11	ENSG00000122359
ANXA2	ENSG00000182718
ANXA5	ENSG00000164111
ANXA6	ENSG00000197043
ANXA7	ENSG00000138279
AOX1	ENSG00000138356
AP000295.9	ENSG00000249624
AP001258.4	ENSG00000245571
AP003068.23	ENSG00000254614
AP1M1	ENSG00000072958
AP1S1	ENSG00000106367
AP2A2	ENSG00000183020
AP3S1	ENSG00000177879
AP5S1	ENSG00000125843
APBA1	ENSG00000107282
APBB1	ENSG00000166313
APBB1IP	ENSG00000077420
APCDD1L	ENSG00000198768
APCDD1L-AS1	ENSG00000231290
APLP2	ENSG00000084234
APOBEC3A	ENSG00000128383
APOBEC3B	ENSG00000179750
APOBEC3B-AS1	ENSG00000249310
APOL3	ENSG00000128284
APOL6	ENSG00000221963
APPBP2	ENSG00000062725
APPL2	ENSG00000136044
ARF1	ENSG00000143761
ARF6	ENSG00000165527
ARFGAP3	ENSG00000242247
ARHGAP1	ENSG00000175220
ARHGAP10	ENSG00000071205
ARHGAP11B	ENSG00000187951
ARHGAP18	ENSG00000146376
ARHGAP21	ENSG00000107863
ARHGAP22	ENSG00000128805
ARHGAP24	ENSG00000138639
ARHGAP29	ENSG00000137962
ARHGDIA	ENSG00000141522
ARHGEF12	ENSG00000196914
ARHGEF17	ENSG00000110237
ARHGEF28	ENSG00000214944
ARHGEF6	ENSG00000129675
ARID5B	ENSG00000150347
ARL2BP	ENSG00000102931
ARL4D	ENSG00000175906
ARL6IP5	ENSG00000144746
ARNTL2	ENSG00000029153
ARNTL2-AS1	ENSG00000245311
ARPC1A	ENSG00000241685
ARPC1B	ENSG00000130429
ARPC2	ENSG00000163466
ARPC5	ENSG00000162704
ARPIN	ENSG00000242498
ARSB	ENSG00000113273
ARSI	ENSG00000183876
ARSJ	ENSG00000180801
ASAP1	ENSG00000153317
ASAP2	ENSG00000151693
ASB8	ENSG00000177981
ASF1B	ENSG00000105011
ASH1L	ENSG00000116539
ASL	ENSG00000126522
ASPA	ENSG00000108381
ASPH	ENSG00000198363
ASPM	ENSG00000066279
ATAD2	ENSG00000156802
ATF6B	ENSG00000213676
ATF7	ENSG00000170653
ATL3	ENSG00000184743
ATOH8	ENSG00000168874
ATOX1	ENSG00000177556
ATP11B	ENSG00000058063
ATP2B1	ENSG00000070961
ATP2B4	ENSG00000058668
ATP6V0E1	ENSG00000113732
ATP8B1	ENSG00000081923
ATP8B2	ENSG00000143515
ATP8B3	ENSG00000130270
ATP9A	ENSG00000054793
AXL	ENSG00000167601
B3GALTL	ENSG00000187676
B3GNT8	ENSG00000177191
B3GNT9	ENSG00000237172
B4GALT1	ENSG00000086062
B4GALT1-AS1	ENSG00000233554
BAALC	ENSG00000164929
BACE1	ENSG00000186318
BAD	ENSG00000002330
BAG2	ENSG00000112208
BAG3	ENSG00000151929
BBS2	ENSG00000125124
BBS5	ENSG00000163093
BBS7	ENSG00000138686
BCAP29	ENSG00000075790
BCAR3	ENSG00000137936
BCL2A1	ENSG00000140379
BCL2L1	ENSG00000171552
BCL2L2	ENSG00000129473
BCL6	ENSG00000113916
BCL7A	ENSG00000110987
BCL7B	ENSG00000106635
BCL7C	ENSG00000099385
BDKRB1	ENSG00000100739
BDKRB2	ENSG00000168398
BEAN1	ENSG00000166546
BEND6	ENSG00000151917
BEND7	ENSG00000165626
BHLHE41	ENSG00000123095
BICC1	ENSG00000122870
BIRC2	ENSG00000110330
BIRC3	ENSG00000023445
BIVM	ENSG00000134897
BIVM-ERCC5	ENSG00000270181
BLOC1S5-TXNDC5	ENSG00000259040
BLVRA	ENSG00000106605
BLVRB	ENSG00000090013
BLZF1	ENSG00000117475
BMP2K	ENSG00000138756
BMP6	ENSG00000153162
BMPER	ENSG00000164619
BMPR2	ENSG00000204217
BNC1	ENSG00000169594
BNIP3	ENSG00000176171
BNIP3L	ENSG00000104765
BRI3	ENSG00000164713
BROX	ENSG00000162819
BTBD1	ENSG00000064726
BTBD6	ENSG00000184887
BTBD9	ENSG00000183826
BTG1	ENSG00000133639
BTN2A1	ENSG00000112763
BX470102.3	ENSG00000238279
C10orf32	ENSG00000166275
C10orf54	ENSG00000107738
C10orf55	ENSG00000222047
C11orf45	ENSG00000174370
C11orf63	ENSG00000109944
C11orf68	ENSG00000175573
C11orf91	ENSG00000205177
C12orf75	ENSG00000235162
C14orf142	ENSG00000170270
C14orf182	ENSG00000214900
C14orf28	ENSG00000179476
C15orf48	ENSG00000166920
C15orf52	ENSG00000188549
C16orf45	ENSG00000166780
C16orf52	ENSG00000185716
C18orf8	ENSG00000141452
C19orf10	ENSG00000074842
C19orf12	ENSG00000131943
C1GALT1C1	ENSG00000171155
C1orf101	ENSG00000179397
C1orf132	ENSG00000203709
C1orf21	ENSG00000116667
C1orf216	ENSG00000142686
C1QTNF2	ENSG00000145861
C1QTNF5	ENSG00000223953
C20orf194	ENSG00000088854
C2CD2	ENSG00000157617
C2CD2L	ENSG00000172375
C3orf14	ENSG00000114405
C3orf18	ENSG00000088543
C3orf67	ENSG00000163689
C3orf67-AS1	ENSG00000242428
C4orf22	ENSG00000197826
C4orf3	ENSG00000164096
C4orf32	ENSG00000174749
C5	ENSG00000106804
C5orf24	ENSG00000181904
C5orf30	ENSG00000181751
C5orf38	ENSG00000186493
C5orf42	ENSG00000197603
C6orf1	ENSG00000186577
C6orf201	ENSG00000185689
C6orf89	ENSG00000198663
C7orf60	ENSG00000164603
C7orf61	ENSG00000185955
C8orf48	ENSG00000164743
C9	ENSG00000113600
C9orf172	ENSG00000232434
C9orf40	ENSG00000135045
C9orf9	ENSG00000165698
CA12	ENSG00000074410
CA5B	ENSG00000169239
CAB39L	ENSG00000102547
CALCOCO2	ENSG00000136436
CALHM2	ENSG00000138172
CALM2	ENSG00000143933
CALU	ENSG00000128595
CAMK1	ENSG00000134072
CAMK1G	ENSG00000008118
CAMK2D	ENSG00000145349
CAMK2N1	ENSG00000162545
CAMKK1	ENSG00000004660
CAMTA2	ENSG00000108509
CANT1	ENSG00000171302
CAP1	ENSG00000131236
CAPG	ENSG00000042493
CAPN1	ENSG00000014216
CAPN2	ENSG00000162909
CAPNS1	ENSG00000126247
CAPZA1	ENSG00000116489
CARD6	ENSG00000132357
CASC2	ENSG00000177640
CASC4	ENSG00000166734
CASC5	ENSG00000137812
CASP4	ENSG00000196954
CASP7	ENSG00000165806
CAST	ENSG00000153113
CAT	ENSG00000121691
CATSPER1	ENSG00000175294
CAV1	ENSG00000105974
CAV2	ENSG00000105971
CBFB	ENSG00000067955
CBR3	ENSG00000159231
CBR3-AS1	ENSG00000236830
CBX7	ENSG00000100307
CC2D1B	ENSG00000154222
CCBE1	ENSG00000183287
CCDC107	ENSG00000159884
CCDC15	ENSG00000149548
CCDC22	ENSG00000101997
CCDC53	ENSG00000120860
CCDC71L	ENSG00000253276
CCDC74B	ENSG00000152076
CCDC80	ENSG00000091986
CCDC82	ENSG00000149231
CCDC85A	ENSG00000055813
CCDC85B	ENSG00000175602
CCDC89	ENSG00000179071
CCDC92	ENSG00000119242
CCDC93	ENSG00000125633
CCIN	ENSG00000185972
CCM2	ENSG00000136280
CCND1	ENSG00000110092
CCND3	ENSG00000112576
CCNDBP1	ENSG00000166946
CCNE2	ENSG00000175305
CCNG2	ENSG00000138764
CCP110	ENSG00000103540
CCR10	ENSG00000184451
CCR7	ENSG00000126353
CCSAP	ENSG00000154429
CCSER2	ENSG00000107771
CD109	ENSG00000156535
CD151	ENSG00000177697
CD164	ENSG00000135535
CD22	ENSG00000012124
CD248	ENSG00000174807
CD274	ENSG00000120217
CD44	ENSG00000026508
CD47	ENSG00000196776
CD59	ENSG00000085063
CD63	ENSG00000135404
CD68	ENSG00000129226
CD82	ENSG00000085117
CD97	ENSG00000123146
CD99	ENSG00000002586
CD99L2	ENSG00000102181
CDA	ENSG00000158825
CDADC1	ENSG00000102543
CDC27	ENSG00000004897
CDC42EP1	ENSG00000128283
CDC42EP3	ENSG00000163171
CDCP1	ENSG00000163814
CDH20	ENSG00000101542
CDK15	ENSG00000138395
CDK17	ENSG00000059758
CDK19	ENSG00000155111
CDKL1	ENSG00000100490
CDKN2C	ENSG00000123080
CDKN2D	ENSG00000129355
CDKN3	ENSG00000100526
CDR1	ENSG00000184258
CDYL2	ENSG00000166446
CEBPB	ENSG00000172216
CEBPB-AS1	ENSG00000277449
CEMIP	ENSG00000103888
CENPB	ENSG00000125817
CENPI	ENSG00000102384
CEP112	ENSG00000154240
CEP128	ENSG00000100629
CEP164	ENSG00000110274
CEP170	ENSG00000143702
CEP41	ENSG00000106477
CEP55	ENSG00000138180
CEP57L1	ENSG00000183137
CERCAM	ENSG00000167123
CETN2	ENSG00000147400
CFAP54	ENSG00000188596
CFB	ENSG00000243649
CFH	ENSG00000000971
CFL2	ENSG00000165410
CFLAR-AS1	ENSG00000226312
CH17-3B23.1	ENSG00000273136
CHMP3	ENSG00000115561
CHPF2	ENSG00000033100
CHRM2	ENSG00000181072
CIB1	ENSG00000185043
CIC	ENSG00000079432
CIDEA	ENSG00000176194
CIITA	ENSG00000179583
CIT	ENSG00000122966
CITED2	ENSG00000164442
CKAP2	ENSG00000136108
CKAP2L	ENSG00000169607
CKAP4	ENSG00000136026
CKLF	ENSG00000217555
CKLF-CMTM1	ENSG00000254788
CLCF1	ENSG00000175505
CLDN11	ENSG00000013297
CLEC11A	ENSG00000105472
CLEC14A	ENSG00000176435
CLEC2B	ENSG00000110852
CLGN	ENSG00000153132
CLIC1	ENSG00000213719
CLIP1	ENSG00000130779
CLIP2	ENSG00000106665
CLIP4	ENSG00000115295
CLMP	ENSG00000166250
CLN5	ENSG00000102805
CLOCK	ENSG00000134852
CLTB	ENSG00000175416
CLVS1	ENSG00000177182
CMB9-22P13.1	ENSG00000173727
CMB9-55A18.1	ENSG00000269570
CMPK1	ENSG00000162368
CMTM1	ENSG00000089505
CNEP1R1	ENSG00000205423
CNGA3	ENSG00000144191
CNIH3	ENSG00000143786
CNKSR3	ENSG00000153721
CNRIP1	ENSG00000119865
CNST	ENSG00000162852
CNTN3	ENSG00000113805
CNTNAP1	ENSG00000108797
CNTROB	ENSG00000170037
COL13A1	ENSG00000197467
COL15A1	ENSG00000204291
COL16A1	ENSG00000084636
COL6A2	ENSG00000142173
COL6A3	ENSG00000163359
COL8A1	ENSG00000144810
COL8A2	ENSG00000171812
COLGALT2	ENSG00000198756
COMMD8	ENSG00000169019
COMP	ENSG00000105664
COMT	ENSG00000093010
COPB1	ENSG00000129083
COPG1	ENSG00000181789
COPRS	ENSG00000172301
COPS7A	ENSG00000111652
COPZ2	ENSG00000005243
COQ10B	ENSG00000115520
CORO1C	ENSG00000110880
CORO2B	ENSG00000103647
COTL1	ENSG00000103187
CPA4	ENSG00000128510
CPD	ENSG00000108582
CPEB1	ENSG00000214575
CPED1	ENSG00000106034
CPNE3	ENSG00000085719
CPNE7	ENSG00000178773
CPPED1	ENSG00000103381
CPTP	ENSG00000224051
CPXM2	ENSG00000121898
CRACR2A	ENSG00000130038
CRAT	ENSG00000095321
CREB3L1	ENSG00000157613
CREB3L2	ENSG00000182158
CREBRF	ENSG00000164463
CRELD2	ENSG00000184164
CRIM1	ENSG00000150938
CRISPLD2	ENSG00000103196
CRLF1	ENSG00000006016
CRNDE	ENSG00000245694
CRTC3	ENSG00000140577
CRYBG3	ENSG00000080200
CRYL1	ENSG00000165475
CSF1R	ENSG00000182578
CSF3	ENSG00000108342
CSGALNACT2	ENSG00000169826
CSMD2	ENSG00000121904
CSPG4	ENSG00000173546
CSRP1	ENSG00000159176
CTA-109P11.4	ENSG00000258114
CTB-35F21.4	ENSG00000250692
CTB-50L17.9	ENSG00000267769
CTB-79E8.2	ENSG00000253445
CTBS	ENSG00000117151
CTC-205M6.5	ENSG00000260841
CTC-277H1.7	ENSG00000262691
CTC-308K20.1	ENSG00000204758
CTC-338M12.6	ENSG00000250900
CTC-366B18.2	ENSG00000248881
CTC-366B18.4	ENSG00000272040
CTC-428H11.2	ENSG00000272367
CTC-436P18.3	ENSG00000249279
CTC-498J12.3	ENSG00000248664
CTC-506B8.1	ENSG00000249180
CTC-518P12.6	ENSG00000267484
CTC-548K16.5	ENSG00000267379
CTD-2001J20.1	ENSG00000280061
CTD-2012K14.2	ENSG00000261396
CTD-2012K14.3	ENSG00000259945
CTD-2012K14.4	ENSG00000260894
CTD-2012M11.3	ENSG00000259603
CTD-2026K11.1	ENSG00000260892
CTD-2031P19.5	ENSG00000262211
CTD-2033A16.1	ENSG00000261602
CTD-2047H16.4	ENSG00000263069
CTD-2066L21.2	ENSG00000251281
CTD-2066L21.3	ENSG00000250697
CTD-2085J24.4	ENSG00000266930
CTD-2116N20.1	ENSG00000250081
CTD-2132N18.3	ENSG00000267261
CTD-2154I11.2	ENSG00000250240
CTD-2195B23.3	ENSG00000269652
CTD-2201E18.3	ENSG00000177738
CTD-2207P18.1	ENSG00000258425
CTD-2207P18.2	ENSG00000258976
CTD-2231E14.2	ENSG00000279198
CTD-2260A17.1	ENSG00000248734
CTD-2263F21.1	ENSG00000251257
CTD-2292P10.4	ENSG00000253741
CTD-2336O2.1	ENSG00000253982
CTD-2349B8.1	ENSG00000261427
CTD-2370N5.3	ENSG00000265118
CTD-2541J13.2	ENSG00000263424
CTD-2544N14.3	ENSG00000253645
CTD-2547L24.3	ENSG00000258875
CTD-2561B21.8	ENSG00000280351
CTD-2589M5.5	ENSG00000254639
CTD-2600O9.2	ENSG00000276166
CTD-2619J13.8	ENSG00000268230
CTD-3032J10.3	ENSG00000269480
CTD-3035K23.3	ENSG00000279713
CTD-3092A11.2	ENSG00000270055
CTD-3105H18.14	ENSG00000268744
CTD-3126B10.1	ENSG00000261093
CTD-3148I10.15	ENSG00000273189
CTD-3193K9.3	ENSG00000267765
CTD-3247H4.2	ENSG00000274654
CTF1	ENSG00000150281
CTHRC1	ENSG00000164932
CTIF	ENSG00000134030
CTNNAL1	ENSG00000119326
CTSA	ENSG00000064601
CTSB	ENSG00000164733
CTSL	ENSG00000135047
CTSO	ENSG00000256043
CTSS	ENSG00000163131
CTSZ	ENSG00000101160
CTTN	ENSG00000085733
CUBN	ENSG00000107611
CUEDC1	ENSG00000180891
CUL4B	ENSG00000158290
CXCL12	ENSG00000107562
CXCL8	ENSG00000169429
CYB561D1	ENSG00000174151
CYB5R3	ENSG00000100243
CYBRD1	ENSG00000071967
CYGB	ENSG00000161544
CYLD	ENSG00000083799
CYP4V2	ENSG00000145476
CYR61	ENSG00000142871
CYS1	ENSG00000205795
CYTH3	ENSG00000008256
DAB2	ENSG00000153071
DAP	ENSG00000112977
DAZAP2	ENSG00000183283
DCAF6	ENSG00000143164
DCBLD1	ENSG00000164465
DCBLD2	ENSG00000057019
DCK	ENSG00000156136
DCLK2	ENSG00000170390
DCLRE1B	ENSG00000118655
DCSTAMP	ENSG00000164935
DCTD	ENSG00000129187
DCTN3	ENSG00000137100
DDAH1	ENSG00000153904
DDIT4L	ENSG00000145358
DDO	ENSG00000203797
DDR2	ENSG00000162733
DDX60	ENSG00000137628
DDX60L	ENSG00000181381
DECR1	ENSG00000104325
DEGS1	ENSG00000143753
DENND1B	ENSG00000213047
DENND3	ENSG00000105339
DENND4A	ENSG00000174485
DENND5A	ENSG00000184014
DFNA5	ENSG00000105928
DHRS7	ENSG00000100612
DHX58	ENSG00000108771
DIAPH3	ENSG00000139734
DIAPH3-AS1	ENSG00000227528
DIEXF	ENSG00000117597
DIRAS3	ENSG00000162595
DKFZP434P228	ENSG00000279232
DKK1	ENSG00000107984
DKK3	ENSG00000050165
DLC1	ENSG00000164741
DLGAP4	ENSG00000080845
DLX1	ENSG00000144355
DMC1	ENSG00000100206
DMRT2	ENSG00000173253
DMXL2	ENSG00000104093
DNAH10	ENSG00000197653
DNAH10OS	ENSG00000250091
DNAJB4	ENSG00000162616
DNAJC13	ENSG00000138246
DNAJC25-GNG10	ENSG00000244115
DNAJC3	ENSG00000102580
DNASE1L1	ENSG00000013563
DNASE1L3	ENSG00000163687
DNMBP	ENSG00000107554
DNMBP-AS1	ENSG00000227695
DOCK10	ENSG00000135905
DOCK11	ENSG00000147251
DOCK5	ENSG00000147459
DOCK7	ENSG00000116641
DOK1	ENSG00000115325
DOK5	ENSG00000101134
DOPEY2	ENSG00000142197
DPF3	ENSG00000205683
DPP9	ENSG00000142002
DPP9-AS1	ENSG00000205790
DPY19L1	ENSG00000173852
DPYD	ENSG00000188641
DPYD-AS1	ENSG00000232878
DRAM1	ENSG00000136048
DRAP1	ENSG00000175550
DRP2	ENSG00000102385
DSCAM	ENSG00000171587
DSEL	ENSG00000171451
DSTYK	ENSG00000133059
DTWD1	ENSG00000104047
DTX3L	ENSG00000163840
DTYMK	ENSG00000168393
DUSP1	ENSG00000120129
DUSP10	ENSG00000143507
DUSP14	ENSG00000276023
DUSP18	ENSG00000167065
DUSP3	ENSG00000108861
DUSP5	ENSG00000138166
DVL1	ENSG00000107404
DYNC1I2	ENSG00000077380
DYNLT3	ENSG00000165169
DYRK3	ENSG00000143479
E2F7	ENSG00000165891
EBF2	ENSG00000221818
EBF3	ENSG00000108001
ECE1	ENSG00000117298
ECI2	ENSG00000198721
ECM1	ENSG00000143369
EDEM1	ENSG00000134109
EDEM3	ENSG00000116406
EEA1	ENSG00000102189
EFCAB1	ENSG00000034239
EFCAB14	ENSG00000159658
EFCAB14-AS1	ENSG00000228237
EFCAB5	ENSG00000176927
EFEMP2	ENSG00000172638
EFHD2	ENSG00000142634
EGFR	ENSG00000146648
EGFR-AS1	ENSG00000224057
EGLN1	ENSG00000135766
EHBP1	ENSG00000115504
EHBP1L1	ENSG00000173442
EHD1	ENSG00000110047
EHD2	ENSG00000024422
EHD4	ENSG00000103966
EHHADH	ENSG00000113790
EHHADH-AS1	ENSG00000223358
EIF5A2	ENSG00000163577
ELF1	ENSG00000120690
ELF4	ENSG00000102034
ELFN2	ENSG00000166897
ELK3	ENSG00000111145
ELL2	ENSG00000118985
ELOVL1	ENSG00000066322
ELTD1	ENSG00000162618
EMILIN2	ENSG00000132205
EMP1	ENSG00000134531
EMP3	ENSG00000142227
ENC1	ENSG00000171617
ENDOD1	ENSG00000149218
ENG	ENSG00000106991
ENOX1	ENSG00000120658
ENPP2	ENSG00000136960
ENTPD4	ENSG00000197217
ENTPD5	ENSG00000187097
ENTPD6	ENSG00000197586
EPAS1	ENSG00000116016
EPDR1	ENSG00000086289
EPG5	ENSG00000152223
EPGN	ENSG00000182585
EPOR	ENSG00000187266
EPS8	ENSG00000151491
ERAP1	ENSG00000164307
ERAP2	ENSG00000164308
ERBB2IP	ENSG00000112851
ERCC5	ENSG00000134899
ERCC6	ENSG00000225830
ERCC6-PGBD3	ENSG00000258838
ERGIC1	ENSG00000113719
ERGIC2	ENSG00000087502
ERI1	ENSG00000104626
ERLEC1	ENSG00000068912
ERLIN1	ENSG00000107566
ERMAP	ENSG00000164010
ERO1L	ENSG00000197930
ERRFI1	ENSG00000116285
ESD	ENSG00000139684
ESM1	ENSG00000164283
ESYT2	ENSG00000117868
ESYT3	ENSG00000158220
ETHE1	ENSG00000105755
EVA1A	ENSG00000115363
EVA1C	ENSG00000166979
EVC	ENSG00000072840
EVI2A	ENSG00000126860
EVI2B	ENSG00000185862
EVI5	ENSG00000067208
EVI5L	ENSG00000142459
EXT1	ENSG00000182197
EXT2	ENSG00000151348
EZH1	ENSG00000108799
F10	ENSG00000126218
F2RL2	ENSG00000164220
FAH	ENSG00000103876
FAIM2	ENSG00000135472
FAM107B	ENSG00000065809
FAM109B	ENSG00000177096
FAM110A	ENSG00000125898
FAM111A	ENSG00000166801
FAM114A1	ENSG00000197712
FAM114A2	ENSG00000055147
FAM115C	ENSG00000170379
FAM120A	ENSG00000048828
FAM120B	ENSG00000112584
FAM120C	ENSG00000184083
FAM127A	ENSG00000134590
FAM127C	ENSG00000212747
FAM129A	ENSG00000135842
FAM129B	ENSG00000136830
FAM132B	ENSG00000178752
FAM134A	ENSG00000144567
FAM151B	ENSG00000152380
FAM160B2	ENSG00000158863
FAM161B	ENSG00000156050
FAM166A	ENSG00000188163
FAM167A	ENSG00000154319
FAM168A	ENSG00000054965
FAM172A	ENSG00000113391
FAM178A	ENSG00000119906
FAM180A	ENSG00000189320
FAM188A	ENSG00000148481
FAM196B	ENSG00000204767
FAM209A	ENSG00000124103
FAM20B	ENSG00000116199
FAM20C	ENSG00000177706
FAM212A	ENSG00000185614
FAM214B	ENSG00000005238
FAM219A	ENSG00000164970
FAM225A	ENSG00000231528
FAM225B	ENSG00000225684
FAM26E	ENSG00000178033
FAM46A	ENSG00000112773
FAM47E-STBD1	ENSG00000272414
FAM50B	ENSG00000145945
FAM65A	ENSG00000039523
FAM69A	ENSG00000154511
FAM73A	ENSG00000180488
FAM89B	ENSG00000176973
FAM91A1	ENSG00000176853
FAP	ENSG00000078098
FARP1-AS1	ENSG00000231194
FBLN5	ENSG00000140092
FBLN7	ENSG00000144152
FBN1	ENSG00000166147
FBRS	ENSG00000156860
FBXL17	ENSG00000145743
FBXL3	ENSG00000005812
FBXO16	ENSG00000214050
FBXO33	ENSG00000165355
FBXO43	ENSG00000156509
FBXO48	ENSG00000204923
FBXO8	ENSG00000164117
FCHO2	ENSG00000157107
FCHSD2	ENSG00000137478
FCRLA	ENSG00000132185
FCRLB	ENSG00000162746
FEZ2	ENSG00000171055
FGF1	ENSG00000113578
FGF14	ENSG00000102466
FGF5	ENSG00000138675
FGF7	ENSG00000140285
FHAD1	ENSG00000142621
FHL2	ENSG00000115641
FHOD3	ENSG00000134775
FICD	ENSG00000198855
FIGNL1	ENSG00000132436
FILIP1L	ENSG00000168386
FIP1L1	ENSG00000145216
FITM2	ENSG00000197296
FJX1	ENSG00000179431
FKBP15	ENSG00000119321
FKBP1A	ENSG00000088832
FKBP1C	ENSG00000198225
FKBP7	ENSG00000079150
FKTN	ENSG00000106692
FLJ12825	ENSG00000248265
FLJ42351	ENSG00000237753
FLJ43879	ENSG00000227744
FLNA	ENSG00000196924
FLNC	ENSG00000128591
FLOT1	ENSG00000137312
FLT3LG	ENSG00000090554
FMN1	ENSG00000248905
FMN2	ENSG00000155816
FN1	ENSG00000115414
FN3KRP	ENSG00000141560
FNDC3A	ENSG00000102531
FNDC3B	ENSG00000075420
FNIP1	ENSG00000217128
FOLR3	ENSG00000110203
FOSL1	ENSG00000175592
FOXC2	ENSG00000176692
FOXC2-AS1	ENSG00000260944
FOXD1	ENSG00000251493
FOXD1-AS1	ENSG00000247993
FOXD2	ENSG00000186564
FOXD2-AS1	ENSG00000237424
FOXF1	ENSG00000103241
FOXF2	ENSG00000137273
FOXJ2	ENSG00000065970
FOXL1	ENSG00000176678
FOXL2	ENSG00000183770
FOXQ1	ENSG00000164379
FPGT	ENSG00000254685
FPGT-TNNI3K	ENSG00000259030
FRMD3	ENSG00000172159
FRMD4A	ENSG00000151474
FRMD6	ENSG00000139926
FRMD6-AS1	ENSG00000273888
FRYL	ENSG00000075539
FST	ENSG00000134363
FSTL1	ENSG00000163430
FSTL3	ENSG00000070404
FUCA2	ENSG00000001036
FURIN	ENSG00000140564
FUT11	ENSG00000196968
FUT8	ENSG00000033170
FXR2	ENSG00000129245
FYCO1	ENSG00000163820
FZD6	ENSG00000164930
FZD8	ENSG00000177283
FZR1	ENSG00000105325
G0S2	ENSG00000123689
GABBR2	ENSG00000136928
GAL3ST4	ENSG00000197093
GALK2	ENSG00000156958
GALNS	ENSG00000141012
GALNT10	ENSG00000164574
GALNT15	ENSG00000131386
GALNT4	ENSG00000257594
GALNT6	ENSG00000139629
GANC	ENSG00000214013
GAS2L1	ENSG00000185340
GAS2L3	ENSG00000139354
GAS6	ENSG00000183087
GAS6-AS1	ENSG00000233695
GAS6-AS2	ENSG00000272695
GBA	ENSG00000177628
GBE1	ENSG00000114480
GBF1	ENSG00000107862
GBP1	ENSG00000117228
GBP2	ENSG00000162645
GBP3	ENSG00000117226
GCLM	ENSG00000023909
GDI1	ENSG00000203879
GDNF	ENSG00000168621
GDNF-AS1	ENSG00000248587
GEM	ENSG00000164949
GHR	ENSG00000112964
GINM1	ENSG00000055211
GIPC1	ENSG00000123159
GIT2	ENSG00000139436
GJA3	ENSG00000121743
GLCE	ENSG00000138604
GLE1	ENSG00000119392
GLIPR1	ENSG00000139278
GLIPR2	ENSG00000122694
GLIS1	ENSG00000174332
GLIS3	ENSG00000107249
GLRX2	ENSG00000023572
GLT8D2	ENSG00000120820
GLTP	ENSG00000139433
GLUD1	ENSG00000148672
GMPPA	ENSG00000144591
GMPR	ENSG00000137198
GNA11	ENSG00000088256
GNAI2	ENSG00000114353
GNB2	ENSG00000172354
GNB4	ENSG00000114450
GNE	ENSG00000159921
GNG10	ENSG00000242616
GNG11	ENSG00000127920
GNG12	ENSG00000172380
GNG2	ENSG00000186469
GNGT1	ENSG00000127928
GNS	ENSG00000135677
GOLGA1	ENSG00000136935
GOLGA2	ENSG00000167110
GOLGA3	ENSG00000090615
GOLIM4	ENSG00000173905
GPAA1	ENSG00000197858
GPATCH11	ENSG00000152133
GPC1	ENSG00000063660
GPER1	ENSG00000164850
GPNMB	ENSG00000136235
GPR1	ENSG00000183671
GPR135	ENSG00000181619
GPR155	ENSG00000163328
GPR157	ENSG00000180758
GPR161	ENSG00000143147
GPR180	ENSG00000152749
GPR4	ENSG00000177464
GPR55	ENSG00000135898
GPR56	ENSG00000205336
GPR68	ENSG00000119714
GPRC5A	ENSG00000013588
GPSM2	ENSG00000121957
GPSM3	ENSG00000213654
GRAMD1B	ENSG00000023171
GRAMD1C	ENSG00000178075
GREM1	ENSG00000166923
GREM2	ENSG00000180875
GRIA3	ENSG00000125675
GRP	ENSG00000134443
GS1-259H13.10	ENSG00000272647
GSK3B	ENSG00000082701
GSTO1	ENSG00000148834
GTF2H5	ENSG00000272047
GTF2IRD2	ENSG00000196275
GTSE1	ENSG00000075218
H1F0	ENSG00000189060
H2AFV	ENSG00000105968
H6PD	ENSG00000049239
HAND2	ENSG00000164107
HAND2-AS1	ENSG00000237125
HAS2	ENSG00000170961
HAS2-AS1	ENSG00000248690
HBEGF	ENSG00000113070
HCFC2	ENSG00000111727
HDLBP	ENSG00000115677
HECA	ENSG00000112406
HEG1	ENSG00000173706
HELZ2	ENSG00000130589
HERC3	ENSG00000138641
HERC4	ENSG00000148634
HERPUD1	ENSG00000051108
HEXB	ENSG00000049860
HFE	ENSG00000010704
HGF	ENSG00000019991
HGS	ENSG00000185359
HGSNAT	ENSG00000165102
HIPK3	ENSG00000110422
HIVEP2	ENSG00000010818
HIVEP3	ENSG00000127124
HLA-E	ENSG00000204592
HLCS	ENSG00000159267
HLX-AS1	ENSG00000257551
HM13	ENSG00000101294
HMOX1	ENSG00000100292
HMSD	ENSG00000221887
HOMER3	ENSG00000051128
HOOK3	ENSG00000168172
HOXB-AS2	ENSG00000239552
HOXB-AS3	ENSG00000233101
HOXB2	ENSG00000173917
HOXB3	ENSG00000120093
HOXB5	ENSG00000120075
HOXB6	ENSG00000108511
HOXB8	ENSG00000120068
HOXC-AS1	ENSG00000250451
HOXC-AS2	ENSG00000250133
HOXC-AS3	ENSG00000251151
HOXC10	ENSG00000180818
HOXC4	ENSG00000198353
HOXC5	ENSG00000273046
HOXC6	ENSG00000197757
HOXC8	ENSG00000037965
HOXC9	ENSG00000180806
HP1BP3	ENSG00000127483
HPCA	ENSG00000121905
HPCAL1	ENSG00000115756
HPS1	ENSG00000107521
HRAS	ENSG00000174775
HS3ST3A1	ENSG00000153976
HS3ST3B1	ENSG00000125430
HSD17B11	ENSG00000198189
HSD3B7	ENSG00000099377
HSDL2	ENSG00000119471
HSPA12A	ENSG00000165868
HSPB1	ENSG00000106211
HSPB6	ENSG00000004776
HSPB7	ENSG00000173641
HTR2A	ENSG00000102468
HTRA1	ENSG00000166033
HYI	ENSG00000178922
ID2	ENSG00000115738
IDNK	ENSG00000148057
IDS	ENSG00000010404
IER3IP1	ENSG00000267228
IFFO1	ENSG00000010295
IFI35	ENSG00000068079
IFI44	ENSG00000137965
IFI44L	ENSG00000137959
IFIT2	ENSG00000119922
IFIT3	ENSG00000119917
IFIT5	ENSG00000152778
IFITM10	ENSG00000244242
IFNAR1	ENSG00000142166
IFNE	ENSG00000184995
IFNGR2	ENSG00000159128
IGFBP3	ENSG00000146674
IGFBP4	ENSG00000141753
IGIP	ENSG00000182700
IKBIP	ENSG00000166130
IKBKB	ENSG00000104365
IKBKE	ENSG00000263528
IKZF2	ENSG00000030419
IL10RB	ENSG00000243646
IL11	ENSG00000095752
IL12A	ENSG00000168811
IL13RA1	ENSG00000131724
IL13RA2	ENSG00000123496
IL15	ENSG00000164136
IL15RA	ENSG00000134470
IL16	ENSG00000172349
IL17RA	ENSG00000177663
IL17RC	ENSG00000163702
IL17RE	ENSG00000163701
IL1R1	ENSG00000115594
IL1RL1	ENSG00000115602
IL1RL2	ENSG00000115598
IL24	ENSG00000162892
IL33	ENSG00000137033
IL4R	ENSG00000077238
IL6ST	ENSG00000134352
IL7R	ENSG00000168685
ILK	ENSG00000166333
IMPAD1	ENSG00000104331
INHBA	ENSG00000122641
INHBB	ENSG00000163083
INIP	ENSG00000148153
INPP4B	ENSG00000109452
INSC	ENSG00000188487
INSIG2	ENSG00000125629
IPP	ENSG00000197429
IQCE	ENSG00000106012
IQGAP1	ENSG00000140575
IQGAP3	ENSG00000183856
IRAK1	ENSG00000184216
IRAK2	ENSG00000134070
IRAK4	ENSG00000198001
IRF2	ENSG00000168310
IRS1	ENSG00000169047
IRX1	ENSG00000170549
IRX2	ENSG00000170561
IRX3	ENSG00000177508
IRX5	ENSG00000176842
ITGA10	ENSG00000143127
ITGA2	ENSG00000164171
ITGA3	ENSG00000005884
ITGA5	ENSG00000161638
ITGA8	ENSG00000077943
ITGB1	ENSG00000150093
ITGB1BP1	ENSG00000119185
ITGB3	ENSG00000259207
ITGBL1	ENSG00000198542
ITPKA	ENSG00000137825
ITPR3	ENSG00000096433
ITPRIP	ENSG00000148841
ITPRIPL2	ENSG00000205730
ITSN2	ENSG00000198399
IVL	ENSG00000163207
JAK1	ENSG00000162434
JAK2	ENSG00000096968
JAM3	ENSG00000166086
JDP2	ENSG00000140044
JMJD6	ENSG00000070495
JOSD2	ENSG00000161677
JPH2	ENSG00000149596
JRKL	ENSG00000183340
JUN	ENSG00000177606
KANK2	ENSG00000197256
KANSL1-AS1	ENSG00000214401
KAT2B	ENSG00000114166
KATNAL1	ENSG00000102781
KCNIP3	ENSG00000115041
KCNJ15	ENSG00000157551
KCNK2	ENSG00000082482
KCNMA1	ENSG00000156113
KCNMA1-AS1	ENSG00000236467
KCNN4	ENSG00000104783
KCNQ5	ENSG00000185760
KCNS2	ENSG00000156486
KCTD10	ENSG00000110906
KCTD18	ENSG00000155729
KCTD21	ENSG00000188997
KCTD4	ENSG00000180332
KCTD7	ENSG00000243335
KCTD9	ENSG00000104756
KDELC2	ENSG00000178202
KDELR2	ENSG00000136240
KDELR3	ENSG00000100196
KDM1B	ENSG00000165097
KIAA0513	ENSG00000135709
KIAA1107	ENSG00000069712
KIAA1279	ENSG00000198954
KIAA1328	ENSG00000150477
KIAA1407	ENSG00000163617
KIAA1456	ENSG00000250305
KIAA1462	ENSG00000165757
KIAA1549L	ENSG00000110427
KIAA1614	ENSG00000135835
KIAA1614-AS1	ENSG00000232586
KIAA1644	ENSG00000138944
KIAA1715	ENSG00000144320
KIAA1731NL	ENSG00000178404
KIAA1841	ENSG00000162929
KIF13A	ENSG00000137177
KIF23	ENSG00000137807
KIF5B	ENSG00000170759
KIF7	ENSG00000166813
KIFC3	ENSG00000140859
KIRREL3	ENSG00000149571
KLF14	ENSG00000266265
KLF2	ENSG00000127528
KLF6	ENSG00000067082
KLHL29	ENSG00000119771
KLHL36	ENSG00000135686
KLHL41	ENSG00000239474
KMT2E	ENSG00000005483
KPRP	ENSG00000203786
KRCC1	ENSG00000172086
KREMEN1	ENSG00000183762
KRR1	ENSG00000111615
KRT15	ENSG00000171346
KRT34	ENSG00000131737
KRT7	ENSG00000135480
KRT81	ENSG00000205426
KRTAP1-1	ENSG00000188581
KRTAP1-5	ENSG00000221852
KRTAP2-3	ENSG00000212724
KRTAP2-4	ENSG00000213417
KY	ENSG00000174611
LACC1	ENSG00000179630
LAMB3	ENSG00000196878
LAMP1	ENSG00000185896
LAMP2	ENSG00000005893
LARP6	ENSG00000166173
LATS2	ENSG00000150457
LAYN	ENSG00000204381
LCE1D	ENSG00000172155
LCE1E	ENSG00000186226
LCE1F	ENSG00000240386
LCE2A	ENSG00000187173
LDHA	ENSG00000134333
LEPREL2	ENSG00000110811
LETM2	ENSG00000165046
LGALS1	ENSG00000100097
LHFP	ENSG00000183722
LIFR	ENSG00000113594
LIMA1	ENSG00000050405
LIN54	ENSG00000189308
LINC00302	ENSG00000176075
LINC00327	ENSG00000232977
LINC00472	ENSG00000233237
LINC00517	ENSG00000259091
LINC00565	ENSG00000260910
LINC00595	ENSG00000227136
LINC00619	ENSG00000204187
LINC00680	ENSG00000215190
LINC00702	ENSG00000233117
LINC00704	ENSG00000231298
LINC00707	ENSG00000238266
LINC00854	ENSG00000236383
LINC00856	ENSG00000230417
LINC00857	ENSG00000237523
LINC00886	ENSG00000240875
LINC00968	ENSG00000246430
LINC00973	ENSG00000240476
LINC01060	ENSG00000249378
LINC01085	ENSG00000248698
LINC01094	ENSG00000251442
LINC01119	ENSG00000239332
LINC01128	ENSG00000228794
LINC01204	ENSG00000229563
LINC01272	ENSG00000224397
LINC01279	ENSG00000272761
LINC01293	ENSG00000230836
LINC01358	ENSG00000230812
LINC01410	ENSG00000238113
LIX1L	ENSG00000271601
LMBRD2	ENSG00000164187
LMF2	ENSG00000100258
LMNA	ENSG00000160789
LMO7	ENSG00000136153
LMO7-AS1	ENSG00000261105
LNPEP	ENSG00000113441
LNX1	ENSG00000072201
LOX	ENSG00000113083
LOXL1	ENSG00000129038
LOXL1-AS1	ENSG00000261801
LOXL2	ENSG00000134013
LOXL3	ENSG00000115318
LPCAT2	ENSG00000087253
LPGAT1	ENSG00000123684
LPIN1	ENSG00000134324
LPP-AS2	ENSG00000270959
LPPR2	ENSG00000105520
LPXN	ENSG00000110031
LRP1	ENSG00000123384
LRP10	ENSG00000197324
LRP11	ENSG00000120256
LRP12	ENSG00000147650
LRRC15	ENSG00000172061
LRRC32	ENSG00000137507
LRRC46	ENSG00000141294
LRRC57	ENSG00000180979
LRRC66	ENSG00000188993
LRRC8C	ENSG00000171488
LRRFIP2	ENSG00000093167
LRRK1	ENSG00000154237
LRRK2	ENSG00000188906
LRRN4CL	ENSG00000177363
LTBP1	ENSG00000049323
LTBP2	ENSG00000119681
LUCAT1	ENSG00000248323
LUZP6	ENSG00000267697
LY6K	ENSG00000160886
LYL1	ENSG00000104903
LYPD6	ENSG00000187123
LYPD6B	ENSG00000150556
LYSMD2	ENSG00000140280
LYST	ENSG00000143669
MAB21L1	ENSG00000180660
MAFF	ENSG00000185022
MAFK	ENSG00000198517
MAGI2-AS3	ENSG00000234456
MAGI3	ENSG00000081026
MALL	ENSG00000144063
MALT1	ENSG00000172175
MAML2	ENSG00000184384
MAMLD1	ENSG00000013619
MAMSTR	ENSG00000176909
MAN1A1	ENSG00000111885
MAN2B2	ENSG00000013288
MANEA	ENSG00000172469
MAP1A	ENSG00000166963
MAP2K3	ENSG00000034152
MAP3K3	ENSG00000198909
MAP3K5	ENSG00000197442
MAP3K6	ENSG00000142733
MAP3K7CL	ENSG00000156265
MAP4	ENSG00000047849
MAP4K4	ENSG00000071054
MAP6	ENSG00000171533
MAP7D1	ENSG00000116871
MAPK1	ENSG00000100030
MAPK3	ENSG00000102882
MAPKAP1	ENSG00000119487
MAPKAPK3	ENSG00000114738
MAPKBP1	ENSG00000137802
2003-03-01	ENSG00000173926
2004-03-01	ENSG00000144583
MAST4	ENSG00000069020
MATN2	ENSG00000132561
MAVS	ENSG00000088888
MBD2	ENSG00000134046
MBNL1	ENSG00000152601
MBNL2	ENSG00000139793
MBOAT2	ENSG00000143797
MBTPS2	ENSG00000012174
MC1R	ENSG00000258839
MCFD2	ENSG00000180398
MDFIC	ENSG00000135272
MDGA1	ENSG00000112139
MECOM	ENSG00000085276
MED10	ENSG00000133398
MED13L	ENSG00000123066
MED31	ENSG00000108590
MED8	ENSG00000159479
MEF2A	ENSG00000068305
MEF2D	ENSG00000116604
MEGF6	ENSG00000162591
MEGF9	ENSG00000106780
MEIS1	ENSG00000143995
MEIS3	ENSG00000105419
MET	ENSG00000105976
METRN	ENSG00000103260
METRNL	ENSG00000176845
MFI2	ENSG00000163975
MFI2-AS1	ENSG00000228109
MFRP	ENSG00000259159
MFSD1	ENSG00000118855
MFSD6	ENSG00000151690
MFSD7	ENSG00000169026
MGARP	ENSG00000137463
MGAT1	ENSG00000131446
MGAT2	ENSG00000168282
MGAT4B	ENSG00000161013
MGLL	ENSG00000074416
MGST3	ENSG00000143198
MICA	ENSG00000204520
MICAL2	ENSG00000133816
MILR1	ENSG00000271605
MINOS1-NBL1	ENSG00000270136
MIR10A	ENSG00000257178
MIR137HG	ENSG00000225206
MIR145	ENSG00000269936
MIR155HG	ENSG00000234883
MIR210HG	ENSG00000247095
MIR222HG	ENSG00000270069
MIR29B1	ENSG00000226380
MIR31HG	ENSG00000171889
MIR4435-1HG	ENSG00000172965
MIR4519	ENSG00000260083
MITF	ENSG00000187098
MKI67	ENSG00000148773
MLK7-AS1	ENSG00000238133
MLPH	ENSG00000115648
MME	ENSG00000196549
MME-AS1	ENSG00000240666
MMP1	ENSG00000196611
MMP10	ENSG00000166670
MMP12	ENSG00000262406
MMP14	ENSG00000157227
MMP3	ENSG00000149968
MMRN2	ENSG00000173269
MOB3A	ENSG00000172081
MOK	ENSG00000080823
MORC4	ENSG00000133131
MOXD1	ENSG00000079931
MPC1	ENSG00000060762
MPC2	ENSG00000143158
MPP3	ENSG00000161647
MPP4	ENSG00000082126
MPRIP	ENSG00000133030
MR1	ENSG00000153029
MRC2	ENSG00000011028
MRGPRF	ENSG00000172935
MRGPRF-AS1	ENSG00000256508
MSANTD3	ENSG00000066697
MSN	ENSG00000147065
MSRA	ENSG00000175806
MSRB2	ENSG00000148450
MSRB3	ENSG00000174099
MSX1	ENSG00000163132
MT1E	ENSG00000169715
MT1M	ENSG00000205364
MT2A	ENSG00000125148
MTDH	ENSG00000147649
MTMR6	ENSG00000139505
MTPN	ENSG00000105887
MTSS1	ENSG00000170873
MTSS1L	ENSG00000132613
MUT	ENSG00000146085
MVP	ENSG00000013364
MXRA7	ENSG00000182534
MXRA8	ENSG00000162576
MYADM	ENSG00000179820
MYBL1	ENSG00000185697
MYBPH	ENSG00000133055
MYEOV	ENSG00000172927
MYH15	ENSG00000144821
MYH9	ENSG00000100345
MYL12A	ENSG00000101608
MYL12B	ENSG00000118680
MYL6	ENSG00000092841
MYLK	ENSG00000065534
MYLK-AS1	ENSG00000239523
MYO1B	ENSG00000128641
MYO1C	ENSG00000197879
MYO5A	ENSG00000197535
MYO7B	ENSG00000169994
MYO9A	ENSG00000066933
MYO9B	ENSG00000099331
MYOF	ENSG00000138119
MYOZ2	ENSG00000172399
MYPN	ENSG00000138347
NAA20	ENSG00000173418
NAAA	ENSG00000138744
NAALADL1	ENSG00000168060
NAALADL2	ENSG00000177694
NAB2	ENSG00000166886
NABP1	ENSG00000173559
NAGA	ENSG00000198951
NAGK	ENSG00000124357
NAGLU	ENSG00000108784
NAGS	ENSG00000161653
NAV1	ENSG00000134369
NAV3	ENSG00000067798
NBEAL1	ENSG00000144426
NBL1	ENSG00000158747
NBPF10	ENSG00000271425
NBPF14	ENSG00000270629
NBPF9	ENSG00000269713
NBR1	ENSG00000188554
NCEH1	ENSG00000144959
NCOA6	ENSG00000198646
NCS1	ENSG00000107130
NCSTN	ENSG00000162736
NDE1	ENSG00000072864
NDEL1	ENSG00000166579
NDNF	ENSG00000173376
NDP	ENSG00000124479
NDP-AS1	ENSG00000236276
NDRG1	ENSG00000104419
NECAP2	ENSG00000157191
NEDD4	ENSG00000069869
NEGR1	ENSG00000172260
NEK10	ENSG00000163491
NEK11	ENSG00000114670
NEK6	ENSG00000119408
NEK7	ENSG00000151414
NENF	ENSG00000117691
NEURL1B	ENSG00000214357
NEXN	ENSG00000162614
NF2	ENSG00000186575
NFASC	ENSG00000163531
NFAT5	ENSG00000102908
NFATC4	ENSG00000100968
NFIC	ENSG00000141905
NFIX	ENSG00000008441
NGF	ENSG00000134259
NHLRC1	ENSG00000187566
NID1	ENSG00000116962
NIM1K	ENSG00000177453
NIN	ENSG00000100503
NIPA1	ENSG00000170113
NIPAL2	ENSG00000104361
NIPAL3	ENSG00000001461
NIPSNAP3A	ENSG00000136783
NKX2-6	ENSG00000180053
NKX3-1	ENSG00000167034
NLRP1	ENSG00000091592
NLRP10	ENSG00000182261
NMRK1	ENSG00000106733
NMT2	ENSG00000152465
NOTCH2	ENSG00000134250
NOTCH2NL	ENSG00000213240
NOX5	ENSG00000255346
NPB	ENSG00000183979
NPHP3	ENSG00000113971
NPR2	ENSG00000159899
NPR3	ENSG00000113389
NQO1	ENSG00000181019
NR1D1	ENSG00000126368
NR1D2	ENSG00000174738
NR2F1	ENSG00000175745
NR2F1-AS1	ENSG00000237187
NR2F2	ENSG00000185551
NR2F2-AS1	ENSG00000247809
NR3C1	ENSG00000113580
NRG1	ENSG00000157168
NRG2	ENSG00000158458
NRGN	ENSG00000154146
NRIP3	ENSG00000175352
NRN1	ENSG00000124785
NRP1	ENSG00000099250
NRSN2	ENSG00000125841
NSF	ENSG00000073969
NT5DC4	ENSG00000144130
NT5E	ENSG00000135318
NTAN1	ENSG00000157045
NTF3	ENSG00000185652
NTM	ENSG00000182667
NTNG1	ENSG00000162631
NTSR1	ENSG00000101188
NUCB2	ENSG00000070081
NUDCD3	ENSG00000015676
NUF2	ENSG00000143228
NUMB	ENSG00000133961
NXPH4	ENSG00000182379
OAS3	ENSG00000111331
OBFC1	ENSG00000107960
ODF2	ENSG00000136811
ODF2-AS1	ENSG00000225951
OGDH	ENSG00000105953
OGFR	ENSG00000060491
OGFRL1	ENSG00000119900
OLFML2B	ENSG00000162745
OPCML	ENSG00000183715
OPHN1	ENSG00000079482
OPN1SW	ENSG00000128617
OPTN	ENSG00000123240
ORAOV1	ENSG00000149716
OSBPL3	ENSG00000070882
OSBPL5	ENSG00000021762
OSBPL6	ENSG00000079156
OSGIN1	ENSG00000140961
OSR1	ENSG00000143867
OSTF1	ENSG00000134996
OSTM1	ENSG00000081087
OXR1	ENSG00000164830
P2RX4	ENSG00000135124
P2RX7	ENSG00000089041
P2RY6	ENSG00000171631
P4HA1	ENSG00000122884
P4HA2	ENSG00000072682
P4HA2-AS1	ENSG00000237714
P4HA3	ENSG00000149380
P4HB	ENSG00000185624
PACS1	ENSG00000175115
PAG1	ENSG00000076641
PALM2-AKAP2	ENSG00000157654
PAM	ENSG00000145730
PAMR1	ENSG00000149090
PAPL	ENSG00000183760
PAPPA	ENSG00000182752
PAPPA-AS1	ENSG00000256040
PAPSS2	ENSG00000198682
PAQR5	ENSG00000137819
PARP10	ENSG00000178685
PARP3	ENSG00000041880
PARP4	ENSG00000102699
PARVA	ENSG00000197702
PAX3	ENSG00000135903
PAX6	ENSG00000007372
PBK	ENSG00000168078
PBX3	ENSG00000167081
PCBP4	ENSG00000090097
PCDHGA1	ENSG00000204956
PCDHGA10	ENSG00000253846
PCDHGA11	ENSG00000253873
PCDHGA12	ENSG00000253159
PCDHGA2	ENSG00000081853
PCDHGA3	ENSG00000254245
PCDHGA4	ENSG00000262576
PCDHGA5	ENSG00000253485
PCDHGA6	ENSG00000253731
PCDHGA7	ENSG00000253537
PCDHGA8	ENSG00000253767
PCDHGA9	ENSG00000261934
PCDHGB1	ENSG00000254221
PCDHGB2	ENSG00000253910
PCDHGB3	ENSG00000262209
PCDHGB4	ENSG00000253953
PCDHGB5	ENSG00000276547
PCDHGB6	ENSG00000253305
PCDHGB7	ENSG00000254122
PCDHGC3	ENSG00000240184
PCDHGC4	ENSG00000242419
PCDHGC5	ENSG00000240764
PCGF5	ENSG00000180628
PCNXL4	ENSG00000126773
PCYT1A	ENSG00000161217
PDCD1LG2	ENSG00000197646
PDCD6IP	ENSG00000170248
PDE1C	ENSG00000154678
PDE4A	ENSG00000065989
PDE4DIP	ENSG00000178104
PDE7B	ENSG00000171408
PDE8A	ENSG00000073417
PDGFRA	ENSG00000134853
PDIA5	ENSG00000065485
PDK1	ENSG00000152256
PDLIM2	ENSG00000120913
PDLIM5	ENSG00000163110
PDZD11	ENSG00000120509
PEA15	ENSG00000162734
PER3	ENSG00000049246
PERM1	ENSG00000187642
PERP	ENSG00000112378
PEX11A	ENSG00000166821
PEX11B	ENSG00000131779
PFKL	ENSG00000141959
PFKP	ENSG00000067057
PGBD3	ENSG00000243251
PHC2	ENSG00000134686
PHC3	ENSG00000173889
PHF11	ENSG00000136147
PHF19	ENSG00000119403
PHF20L1	ENSG00000129292
PHKG1	ENSG00000164776
PHLDA2	ENSG00000181649
PHTF2	ENSG00000006576
PI4K2B	ENSG00000038210
PI4KA	ENSG00000241973
PICALM	ENSG00000073921
PIEZO1	ENSG00000103335
PIGB	ENSG00000069943
PIGK	ENSG00000142892
PIGT	ENSG00000124155
PIGV	ENSG00000060642
PIK3CA	ENSG00000121879
PIK3R1	ENSG00000145675
PINK1	ENSG00000158828
PINK1-AS	ENSG00000117242
PITPNM2	ENSG00000090975
PITRM1	ENSG00000107959
PITRM1-AS1	ENSG00000237399
PITX2	ENSG00000164093
PIWIL4	ENSG00000134627
PJA2	ENSG00000198961
PK	ENSG00000091436
PKIG	ENSG00000168734
PKM	ENSG00000067225
PLA2G15	ENSG00000103066
PLA2G5	ENSG00000127472
PLA2R1	ENSG00000153246
PLAC9	ENSG00000189129
PLAT	ENSG00000104368
PLAU	ENSG00000122861
PLAUR	ENSG00000011422
PLCL1	ENSG00000115896
PLCXD3	ENSG00000182836
PLD4	ENSG00000166428
PLEC	ENSG00000178209
PLEK2	ENSG00000100558
PLEKHA2	ENSG00000169499
PLEKHG4	ENSG00000196155
PLEKHM1	ENSG00000225190
PLEKHN1	ENSG00000187583
PLIN3	ENSG00000105355
PLOD1	ENSG00000083444
PLOD2	ENSG00000152952
PLOD3	ENSG00000106397
PLP2	ENSG00000102007
PLS3	ENSG00000102024
PLXNA2	ENSG00000076356
PLXNA3	ENSG00000130827
PLXNA4	ENSG00000221866
PML	ENSG00000140464
PMM1	ENSG00000100417
PNPLA8	ENSG00000135241
PNPO	ENSG00000108439
POC1B-GALNT4	ENSG00000259075
PODN	ENSG00000174348
POFUT1	ENSG00000101346
POLE4	ENSG00000115350
POLH	ENSG00000170734
POLK	ENSG00000122008
POLR2L	ENSG00000177700
POLR3GL	ENSG00000121851
POMGNT1	ENSG00000085998
POPDC3	ENSG00000132429
POU2F2	ENSG00000028277
PPAPDC1A	ENSG00000203805
PPARA	ENSG00000186951
PPARD	ENSG00000112033
PPDPF	ENSG00000125534
PPFIBP1	ENSG00000110841
PPM1F	ENSG00000100034
PPM1M	ENSG00000164088
PPP1R11	ENSG00000204619
PPP1R15A	ENSG00000087074
PPP1R18	ENSG00000146112
PPP1R3D	ENSG00000132825
PPP1R3G	ENSG00000219607
PPP1R9B	ENSG00000108819
PPP2R3A	ENSG00000073711
PPP3CB	ENSG00000107758
PPP3CC	ENSG00000120910
PQLC2L	ENSG00000174899
PQLC3	ENSG00000162976
PRADC1	ENSG00000135617
PRC1	ENSG00000198901
PRC1-AS1	ENSG00000258725
PRCD	ENSG00000214140
PRDM4	ENSG00000110851
PRDM8	ENSG00000152784
PREX1	ENSG00000124126
PRICKLE2	ENSG00000163637
PRICKLE2-AS1	ENSG00000241111
PRKAA1	ENSG00000132356
PRKACA	ENSG00000072062
PRKAG1	ENSG00000181929
PRKAG2	ENSG00000106617
PRKAR1A	ENSG00000108946
PRKCA	ENSG00000154229
PRKCD	ENSG00000163932
PRKCDBP	ENSG00000170955
PRKCE	ENSG00000171132
PRKD1	ENSG00000184304
PRKG2	ENSG00000138669
PRLR	ENSG00000113494
PRMT2	ENSG00000160310
PRNP	ENSG00000171867
PRR16	ENSG00000184838
PRR5L	ENSG00000135362
PRRT1	ENSG00000204314
PRRX1	ENSG00000116132
PRRX2	ENSG00000167157
PRSS3	ENSG00000010438
PRSS53	ENSG00000151006
PRTFDC1	ENSG00000099256
PSCA	ENSG00000167653
PSD3	ENSG00000156011
PSD4	ENSG00000125637
PSG1	ENSG00000231924
PSG11	ENSG00000243130
PSG2	ENSG00000242221
PSG4	ENSG00000243137
PSG5	ENSG00000204941
PSG6	ENSG00000170848
PSG7	ENSG00000221878
PSG8	ENSG00000124467
PSG9	ENSG00000183668
PSMB9	ENSG00000240065
PSMD2	ENSG00000175166
PSME1	ENSG00000092010
PTGER2	ENSG00000125384
PTGER3	ENSG00000050628
PTGER4	ENSG00000171522
PTGES	ENSG00000148344
PTGFR	ENSG00000122420
PTGIR	ENSG00000160013
PTGS1	ENSG00000095303
PTP4A2	ENSG00000184007
PTPLAD2	ENSG00000188921
PTPN14	ENSG00000152104
PTPN18	ENSG00000072135
PTPN21	ENSG00000070778
PTPN22	ENSG00000134242
PTPRQ	ENSG00000139304
PTRF	ENSG00000177469
PTTG1IP	ENSG00000183255
PTX3	ENSG00000163661
PURA	ENSG00000185129
PVR	ENSG00000073008
PXDC1	ENSG00000168994
PXK	ENSG00000168297
PXMP4	ENSG00000101417
PXN	ENSG00000089159
PXN-AS1	ENSG00000255857
PYROXD1	ENSG00000121350
QSOX1	ENSG00000116260
RAB11FIP5	ENSG00000135631
RAB14	ENSG00000119396
RAB1B	ENSG00000174903
RAB22A	ENSG00000124209
RAB23	ENSG00000112210
RAB27A	ENSG00000069974
RAB2A	ENSG00000104388
RAB31	ENSG00000168461
RAB32	ENSG00000118508
RAB36	ENSG00000100228
RAB3B	ENSG00000169213
RAB5C	ENSG00000108774
RAB7A	ENSG00000075785
RAB7B	ENSG00000276600
RABEP2	ENSG00000177548
RABGEF1	ENSG00000154710
RABIF	ENSG00000183155
RAC2	ENSG00000128340
RACGAP1	ENSG00000161800
RAD9B	ENSG00000151164
RAET1E-AS1	ENSG00000268592
RAET1G	ENSG00000203722
RALB	ENSG00000144118
RALGPS2	ENSG00000116191
RAP1A	ENSG00000116473
RAP1B	ENSG00000127314
RAP1GDS1	ENSG00000138698
RAPH1	ENSG00000173166
RASA1	ENSG00000145715
RASA2	ENSG00000155903
RASA3	ENSG00000185989
RASGRP3	ENSG00000152689
RASSF1	ENSG00000068028
RASSF8	ENSG00000123094
RB1	ENSG00000139687
RBFOX2	ENSG00000100320
RBL1	ENSG00000080839
RBL2	ENSG00000103479
RBM24	ENSG00000112183
RBM43	ENSG00000184898
RBMS1	ENSG00000153250
RBMS2	ENSG00000076067
RBPJ	ENSG00000168214
RCAN1	ENSG00000159200
RCAN2	ENSG00000172348
RCN1	ENSG00000049449
RCN3	ENSG00000142552
RDH5	ENSG00000135437
RECK	ENSG00000122707
RECQL	ENSG00000004700
REEP3	ENSG00000165476
RELA	ENSG00000173039
RELN	ENSG00000189056
REP15	ENSG00000174236
RER1	ENSG00000157916
RETSAT	ENSG00000042445
RFTN1	ENSG00000131378
RFX2	ENSG00000087903
RFX8	ENSG00000196460
RGMB	ENSG00000174136
RGMB-AS1	ENSG00000246763
RGN	ENSG00000130988
RGS17	ENSG00000091844
RGS4	ENSG00000117152
RHBDL2	ENSG00000158315
RHCE	ENSG00000188672
RHOA	ENSG00000067560
RHOBTB2	ENSG00000008853
RHOBTB3	ENSG00000164292
RHOC	ENSG00000155366
RHOG	ENSG00000177105
RIBC2	ENSG00000128408
RIC8A	ENSG00000177963
RIN1	ENSG00000174791
RIN2	ENSG00000132669
RIN3	ENSG00000100599
RIOK3	ENSG00000101782
RIPK1	ENSG00000137275
RIPK2	ENSG00000104312
RIPK3	ENSG00000129465
RMDN1	ENSG00000176623
RNASE4	ENSG00000258818
RND3	ENSG00000115963
RNF11	ENSG00000123091
RNF14	ENSG00000013561
RNF182	ENSG00000180537
RNF19A	ENSG00000034677
RNF213	ENSG00000173821
RNF24	ENSG00000101236
RNF6	ENSG00000127870
RNH1	ENSG00000023191
RNPEPL1	ENSG00000142327
ROBO4	ENSG00000154133
ROCK2	ENSG00000134318
ROPN1L	ENSG00000145491
RP1-117B12.4	ENSG00000253102
RP1-127H14.3	ENSG00000255692
RP1-20N2.8	ENSG00000278206
RP1-261G23.7	ENSG00000272114
RP1-309I22.2	ENSG00000279338
RP1-37E16.12	ENSG00000100101
RP1-43E13.2	ENSG00000230424
RP1-67K17.3	ENSG00000233138
RP1-68D18.2	ENSG00000251194
RP1-68D18.4	ENSG00000255443
RP1-79C4.4	ENSG00000271811
RP1-92O14.6	ENSG00000229431
RP11-1002K11.1	ENSG00000272327
RP11-100E13.1	ENSG00000233384
RP11-101E7.2	ENSG00000260277
RP11-1021N1.1	ENSG00000261130
RP11-1024P17.1	ENSG00000261468
RP11-102K13.5	ENSG00000278309
RP11-104N10.2	ENSG00000274627
RP11-1060J15.4	ENSG00000256377
RP11-1060J15.9	ENSG00000276261
RP11-1069G10.1	ENSG00000259370
RP11-1072A3.3	ENSG00000279196
RP11-107E5.2	ENSG00000278976
RP11-108P20.1	ENSG00000267010
RP11-108P20.3	ENSG00000267705
RP11-1099M24.7	ENSG00000262730
RP11-1102P22.1	ENSG00000279415
RP11-1151B14.4	ENSG00000267257
RP11-123M6.2	ENSG00000258663
RP11-124N14.3	ENSG00000234961
RP11-127L20.5	ENSG00000270075
RP11-1299A16.3	ENSG00000260641
RP11-129M16.4	ENSG00000277879
RP11-138E9.2	ENSG00000264876
RP11-138H8.6	ENSG00000259744
RP11-138I1.2	ENSG00000264739
RP11-143K11.5	ENSG00000264860
RP11-145M4.3	ENSG00000237352
RP11-145M9.4	ENSG00000269728
RP11-148B18.3	ENSG00000226835
RP11-150O12.1	ENSG00000253161
RP11-154D6.1	ENSG00000232295
RP11-155D18.12	ENSG00000272762
RP11-159G9.5	ENSG00000229729
RP11-165A20.3	ENSG00000273107
RP11-166D19.1	ENSG00000255248
RP11-177H13.2	ENSG00000253837
RP11-184M15.1	ENSG00000248187
RP11-196G11.1	ENSG00000255439
RP11-196H14.2	ENSG00000255886
RP11-196H14.3	ENSG00000255629
RP11-196H14.4	ENSG00000255817
RP11-1E6.1	ENSG00000250657
RP11-203J24.9	ENSG00000257524
RP11-210N13.4	ENSG00000276981
RP11-211G23.2	ENSG00000260877
RP11-211G3.3	ENSG00000228804
RP11-213G6.2	ENSG00000254002
RP11-216B9.6	ENSG00000228395
RP11-221N13.3	ENSG00000256268
RP11-221N13.4	ENSG00000256915
RP11-222K16.2	ENSG00000272282
RP11-225H22.7	ENSG00000273485
RP11-227D13.1	ENSG00000259705
RP11-228B15.4	ENSG00000225032
RP11-230G5.2	ENSG00000250748
RP11-234G16.4	ENSG00000275327
RP11-23P13.6	ENSG00000174171
RP11-244O19.1	ENSG00000261534
RP11-247A12.1	ENSG00000234055
RP11-253M7.1	ENSG00000259426
RP11-261C10.4	ENSG00000232085
RP11-261C10.5	ENSG00000227230
RP11-264I13.2	ENSG00000236199
RP11-265D17.2	ENSG00000254680
RP11-269F20.1	ENSG00000236031
RP11-272L13.3	ENSG00000269998
RP11-273G15.2	ENSG00000247317
RP11-283G6.3	ENSG00000256894
RP11-283G6.5	ENSG00000255750
RP11-286O18.1	ENSG00000258843
RP11-290H9.4	ENSG00000263293
RP11-293I14.2	ENSG00000258064
RP11-295P9.3	ENSG00000239665
RP11-298E9.7	ENSG00000278419
RP11-29G8.3	ENSG00000261553
RP11-2N1.2	ENSG00000267774
RP11-303E16.2	ENSG00000261061
RP11-309L24.2	ENSG00000242902
RP11-30P6.6	ENSG00000234155
RP11-314N13.10	ENSG00000274322
RP11-315I20.3	ENSG00000244619
RP11-318M2.3	ENSG00000253851
RP11-320G24.1	ENSG00000236393
RP11-323N12.5	ENSG00000267601
RP11-332H17.1	ENSG00000232959
RP11-332H18.5	ENSG00000267131
RP11-334A14.5	ENSG00000232993
RP11-335I12.2	ENSG00000256072
RP11-338K17.8	ENSG00000255839
RP11-339B21.10	ENSG00000273186
RP11-342D11.2	ENSG00000238258
RP11-342M3.5	ENSG00000235426
RP11-344N10.2	ENSG00000237768
RP11-350F4.2	ENSG00000257742
RP11-350J20.12	ENSG00000273132
[truncated: 804 more rows]

## Sheet: Temporarily upregulated
Gene	ID
A4GALT	ENSG00000128274
ABCA4	ENSG00000198691
ABCB8	ENSG00000197150
ABHD14A	ENSG00000248487
ABHD15-AS1	ENSG00000264031
ABTB1	ENSG00000114626
AC000123.2	ENSG00000280347
AC000123.3	ENSG00000279265
AC002398.11	ENSG00000267439
AC003986.6	ENSG00000232821
AC005944.2	ENSG00000267469
AC006449.2	ENSG00000279119
AC006946.16	ENSG00000273203
AC007036.5	ENSG00000251660
AC007246.3	ENSG00000231312
AC007563.5	ENSG00000236886
AC009336.19	ENSG00000278500
AC016747.3	ENSG00000212978
AC017101.10	ENSG00000227227
AC025171.1	ENSG00000215068
AC068831.15	ENSG00000259661
AC093495.4	ENSG00000228242
AC098617.1	ENSG00000233766
AC108488.4	ENSG00000242282
ACADS	ENSG00000122971
ACADVL	ENSG00000072778
ACAN	ENSG00000157766
ACAP3	ENSG00000131584
ACAT1	ENSG00000075239
ACSS1	ENSG00000154930
ACTR1B	ENSG00000115073
ACVR1	ENSG00000115170
ACYP1	ENSG00000119640
ADAM32	ENSG00000197140
ADAM33	ENSG00000149451
ADAMTS5	ENSG00000154736
ADAMTS9-AS2	ENSG00000241684
ADCK5	ENSG00000173137
ADCY4	ENSG00000129467
AES	ENSG00000104964
AF131217.1	ENSG00000232855
AF196779.12	ENSG00000250232
AFAP1L1	ENSG00000157510
AGAP3	ENSG00000133612
AIFM2	ENSG00000042286
AIM1	ENSG00000112297
AIP	ENSG00000110711
AKIP1	ENSG00000166452
AKR1C1	ENSG00000187134
AKR1C2	ENSG00000151632
AKR1C3	ENSG00000196139
AKR1E2	ENSG00000165568
AKR7A2	ENSG00000053371
AL161784.1	ENSG00000280315
ALDH1L2	ENSG00000136010
ALS2CR11	ENSG00000155754
ALX4	ENSG00000052850
ANGPTL2	ENSG00000136859
ANKH	ENSG00000154122
ANKMY1	ENSG00000144504
ANKRD29	ENSG00000154065
ANKRD36C	ENSG00000174501
ANKRD44	ENSG00000065413
ANXA2R	ENSG00000177721
ANXA4	ENSG00000196975
AP000721.4	ENSG00000256100
AP001046.5	ENSG00000237989
AP003419.11	ENSG00000256514
AP4B1	ENSG00000134262
AP4B1-AS1	ENSG00000226167
APCDD1	ENSG00000154856
APLN	ENSG00000171388
APMAP	ENSG00000101474
APOBEC3C	ENSG00000244509
APOBEC3G	ENSG00000239713
APOD	ENSG00000189058
AQP1	ENSG00000250424
ARHGAP20	ENSG00000137727
ARHGAP31	ENSG00000031081
ARHGAP6	ENSG00000047648
ARHGDIB	ENSG00000111348
ARHGEF1	ENSG00000076928
ARL10	ENSG00000175414
ARRDC2	ENSG00000105643
ARRDC3	ENSG00000113369
ASXL1	ENSG00000171456
ATG16L2	ENSG00000168010
ATP6V0E2	ENSG00000171130
ATP6V0E2-AS1	ENSG00000204934
ATP6V1B1	ENSG00000116039
ATXN1	ENSG00000124788
AZIN2	ENSG00000142920
B3GALT2	ENSG00000162630
B3GALT4	ENSG00000235863
B9D2	ENSG00000123810
BAHCC1	ENSG00000266074
BAZ1A	ENSG00000198604
BBIP1	ENSG00000214413
BCL3	ENSG00000069399
BCORL1	ENSG00000085185
BGN	ENSG00000182492
BHLHE40	ENSG00000134107
BLOC1S1	ENSG00000135441
BMI1	ENSG00000168283
BMP1	ENSG00000168487
BMP2	ENSG00000125845
BOC	ENSG00000144857
BRF2	ENSG00000104221
BST1	ENSG00000109743
BTBD19	ENSG00000222009
BTG3	ENSG00000154640
C10orf10	ENSG00000165507
C11orf70	ENSG00000137691
C12orf56	ENSG00000185306
C12orf79	ENSG00000257242
C15orf61	ENSG00000189227
C16orf86	ENSG00000159761
C16orf95	ENSG00000260456
C17orf82	ENSG00000187013
C19orf40	ENSG00000131944
C19orf70	ENSG00000174917
C19orf83	ENSG00000267757
C1QTNF1	ENSG00000173918
C1R	ENSG00000159403
C1S	ENSG00000182326
C22orf46	ENSG00000184208
C2orf74	ENSG00000237651
C2orf88	ENSG00000187699
C4orf33	ENSG00000151470
C5orf66	ENSG00000224186
C8orf46	ENSG00000169085
C9orf117	ENSG00000160401
C9orf3	ENSG00000148120
CA13	ENSG00000185015
CACNB3	ENSG00000167535
CALCOCO1	ENSG00000012822
CAMK2A	ENSG00000070808
CAPS	ENSG00000105519
CAPS2	ENSG00000180881
CARD16	ENSG00000204397
CASP1	ENSG00000137752
CASP10	ENSG00000003400
CASP8	ENSG00000064012
CBX8	ENSG00000141570
CCDC109B	ENSG00000005059
CCDC130	ENSG00000104957
CCDC36	ENSG00000173421
CCDC50	ENSG00000152492
CCL2	ENSG00000108691
CCNH	ENSG00000134480
CD14	ENSG00000170458
CD27-AS1	ENSG00000215039
CD302	ENSG00000241399
CD55	ENSG00000196352
CDC25B	ENSG00000101224
CDC42BPA	ENSG00000143776
CDC42EP2	ENSG00000149798
CDC42EP4	ENSG00000179604
CDC42EP5	ENSG00000167617
CDH13	ENSG00000140945
CDH4	ENSG00000179242
CDHR3	ENSG00000128536
CDKN2A	ENSG00000147889
CDKN2B	ENSG00000147883
CDKN2B-AS1	ENSG00000240498
CEACAM19	ENSG00000186567
CEBPD	ENSG00000221869
CECR7	ENSG00000237438
CEP290	ENSG00000198707
CERKL	ENSG00000188452
CES1	ENSG00000198848
CES2	ENSG00000172831
CFAP44	ENSG00000206530
CHCHD2	ENSG00000106153
CHD3	ENSG00000170004
CHPT1	ENSG00000111666
CHRD	ENSG00000090539
CHST11	ENSG00000171310
CHST12	ENSG00000136213
CHST14	ENSG00000169105
CHST3	ENSG00000122863
CLEC3B	ENSG00000163815
CLUAP1	ENSG00000103351
CMTM3	ENSG00000140931
CNPY4	ENSG00000166997
COBLL1	ENSG00000082438
COL17A1	ENSG00000065618
COL3A1	ENSG00000168542
COL5A2	ENSG00000204262
COL7A1	ENSG00000114270
COLEC12	ENSG00000158270
COLGALT1	ENSG00000130309
COMMD3	ENSG00000148444
COMMD3-BMI1	ENSG00000269897
COQ6	ENSG00000119723
CORO6	ENSG00000167549
CPM	ENSG00000135678
CPNE2	ENSG00000140848
CPNE8	ENSG00000139117
CPS1	ENSG00000021826
CPT1A	ENSG00000110090
CRABP2	ENSG00000143320
CREB5	ENSG00000146592
CRIP1	ENSG00000213145
CRTAP	ENSG00000170275
CRYZL1	ENSG00000205758
CSDC2	ENSG00000172346
CSRNP1	ENSG00000144655
CST3	ENSG00000101439
CTB-193M12.5	ENSG00000280206
CTB-58E17.1	ENSG00000277969
CTB-58E17.9	ENSG00000275665
CTB-5E10.3	ENSG00000267633
CTC-241F20.3	ENSG00000268001
CTC-558O2.1	ENSG00000254042
CTC-558O2.2	ENSG00000254192
CTD-2006M22.2	ENSG00000278934
CTD-2078B5.2	ENSG00000271334
CTD-2616J11.11	ENSG00000269403
CTD-2616J11.9	ENSG00000267984
CTD-3035K23.7	ENSG00000274565
CTD-3049M7.1	ENSG00000258754
CTD-3099C6.9	ENSG00000269825
CTD-3184A7.4	ENSG00000232442
CTDSP1	ENSG00000144579
CTGF	ENSG00000118523
CTSK	ENSG00000143387
CUL9	ENSG00000112659
CXCL1	ENSG00000163739
CXCL2	ENSG00000081041
CXCL3	ENSG00000163734
CXCL6	ENSG00000124875
CXorf40A	ENSG00000197620
CYP2E1	ENSG00000130649
CYP3A5	ENSG00000106258
D2HGDH	ENSG00000180902
DAAM2	ENSG00000146122
DAPK2	ENSG00000035664
DCDC2B	ENSG00000222046
DCHS1	ENSG00000166341
DCN	ENSG00000011465
DENND2A	ENSG00000146966
DENND2D	ENSG00000162777
DERA	ENSG00000023697
DHRS4	ENSG00000157326
DHRS4-AS1	ENSG00000215256
DHRS4L2	ENSG00000187630
DIP2A	ENSG00000160305
DMTN	ENSG00000158856
DNM3OS	ENSG00000230630
DOK6	ENSG00000206052
DPT	ENSG00000143196
DUSP7	ENSG00000164086
DYRK4	ENSG00000010219
EBF1	ENSG00000164330
ECHDC2	ENSG00000121310
EDA2R	ENSG00000131080
EGR1	ENSG00000120738
EGR3	ENSG00000179388
EHD3	ENSG00000013016
ELMOD3	ENSG00000115459
ELMSAN1	ENSG00000156030
EMCN	ENSG00000164035
EML3	ENSG00000149499
EML6	ENSG00000214595
EMP2	ENSG00000213853
EMX2	ENSG00000170370
EMX2OS	ENSG00000229847
ENKD1	ENSG00000124074
EPB41L3	ENSG00000082397
EPHA4	ENSG00000116106
EPHB1	ENSG00000154928
EPHB3	ENSG00000182580
EPSTI1	ENSG00000133106
ERI2	ENSG00000196678
ERVK13-1	ENSG00000260565
ETFB	ENSG00000105379
ETS1	ENSG00000134954
EXOC1	ENSG00000090989
F3	ENSG00000117525
F8	ENSG00000185010
FAIM	ENSG00000158234
FAIM3	ENSG00000162894
FAM102B	ENSG00000162636
FAM196A	ENSG00000188916
FAM198B	ENSG00000164125
FAM19A2	ENSG00000198673
FAM20A	ENSG00000108950
FAM210B	ENSG00000124098
FAM228B	ENSG00000219626
FAM24B	ENSG00000213185
FAM50A	ENSG00000071859
FAM84A	ENSG00000162981
FAM89A	ENSG00000182118
FAM98C	ENSG00000130244
FAS	ENSG00000026103
FBXO4	ENSG00000151876
FBXW5	ENSG00000159069
FER	ENSG00000151422
FERMT3	ENSG00000149781
FES	ENSG00000182511
FEZ1	ENSG00000149557
FIBIN	ENSG00000176971
FLI1	ENSG00000151702
FLJ20021	ENSG00000254531
FLJ37035	ENSG00000224023
FLNB	ENSG00000136068
FLNB-AS1	ENSG00000244161
FLRT2	ENSG00000185070
FLRT3	ENSG00000125848
FMOD	ENSG00000122176
FOS	ENSG00000170345
FOSB	ENSG00000125740
FOSL2	ENSG00000075426
FOXC1	ENSG00000054598
FOXK1	ENSG00000164916
FOXP1	ENSG00000114861
FOXP2	ENSG00000128573
FRS3	ENSG00000137218
FUT8-AS1	ENSG00000276116
FXYD5	ENSG00000089327
FZD1	ENSG00000157240
FZD10-AS1	ENSG00000250208
GABPB2	ENSG00000143458
GABRE	ENSG00000102287
GADD45B	ENSG00000099860
GAS1	ENSG00000180447
GBP5	ENSG00000154451
GCNT1	ENSG00000187210
GFRA1	ENSG00000151892
GGH	ENSG00000137563
GGT5	ENSG00000099998
GIMAP2	ENSG00000106560
GJC2	ENSG00000198835
GLI3	ENSG00000106571
GLRB	ENSG00000109738
GLT8D1	ENSG00000016864
GMFG	ENSG00000130755
GNG12-AS1	ENSG00000232284
GP1BB	ENSG00000203618
GPAT2	ENSG00000186281
GPR124	ENSG00000020181
GPR126	ENSG00000112414
GPR133	ENSG00000111452
GPR39	ENSG00000183840
GPR85	ENSG00000164604
GRID1	ENSG00000182771
GRK4	ENSG00000125388
GRK5	ENSG00000198873
GRN	ENSG00000030582
GS1-124K5.11	ENSG00000229180
GS1-293C5.1	ENSG00000273138
GSAP	ENSG00000186088
GSC	ENSG00000133937
GSN	ENSG00000148180
GSN-AS1	ENSG00000235865
GSS	ENSG00000100983
GUCY1B3	ENSG00000061918
GXYLT2	ENSG00000172986
GYPC	ENSG00000136732
HAGH	ENSG00000063854
HAGLR	ENSG00000224189
HAGLROS	ENSG00000226363
HAND1	ENSG00000113196
HCLS1	ENSG00000180353
HDAC10	ENSG00000100429
HEIH	ENSG00000278970
HEMK1	ENSG00000114735
HEXA	ENSG00000213614
HHAT	ENSG00000054392
HHIPL2	ENSG00000143512
HIC1	ENSG00000177374
HLX	ENSG00000136630
HMGCL	ENSG00000117305
HOTAIR	ENSG00000228630
HOXA-AS2	ENSG00000253552
HOXA-AS3	ENSG00000254369
HOXA1	ENSG00000105991
HOXA10	ENSG00000253293
HOXA10-AS	ENSG00000253187
HOXA10-HOXA9	ENSG00000257184
HOXA11	ENSG00000005073
HOXA11-AS	ENSG00000240990
HOXA13	ENSG00000106031
HOXA2	ENSG00000105996
HOXA3	ENSG00000105997
HOXA4	ENSG00000197576
HOXA5	ENSG00000106004
HOXA6	ENSG00000106006
HOXA7	ENSG00000122592
HOXA9	ENSG00000078399
HOXB-AS1	ENSG00000230148
HOXB4	ENSG00000182742
HOXB7	ENSG00000260027
HOXB9	ENSG00000170689
HOXD-AS2	ENSG00000237380
HOXD3	ENSG00000128652
HOXD4	ENSG00000170166
HOXD8	ENSG00000175879
HOXD9	ENSG00000128709
HPSE	ENSG00000173083
HR	ENSG00000168453
HRCT1	ENSG00000196196
HRH1	ENSG00000196639
HSBP1L1	ENSG00000226742
HTRA3	ENSG00000170801
HYLS1	ENSG00000198331
IAH1	ENSG00000134330
IDH3A	ENSG00000166411
IER3	ENSG00000137331
IER5	ENSG00000162783
IFI16	ENSG00000163565
IFI27	ENSG00000165949
IFI30	ENSG00000216490
IFT46	ENSG00000118096
IFT88	ENSG00000032742
IGFBP5	ENSG00000115461
IGFBP6	ENSG00000167779
IL1RAP	ENSG00000196083
IL31RA	ENSG00000164509
IL6R	ENSG00000160712
INAFM1	ENSG00000257704
INCA1	ENSG00000196388
INPP1	ENSG00000151689
INPP5E	ENSG00000148384
IQCH-AS1	ENSG00000259673
IRAK3	ENSG00000090376
IRF1	ENSG00000125347
IRF2BP2	ENSG00000168264
ISLR	ENSG00000129009
ITGA1	ENSG00000213949
ITGA4	ENSG00000115232
ITGB7	ENSG00000139626
JMJD1C-AS1	ENSG00000272767
JOSD1	ENSG00000100221
JUNB	ENSG00000171223
KAZALD1	ENSG00000107821
KB-1107E3.1	ENSG00000253629
KB-1732A1.1	ENSG00000253669
KCNE4	ENSG00000152049
KCNJ8	ENSG00000121361
KCTD12	ENSG00000178695
KDM6B	ENSG00000132510
KIAA0247	ENSG00000100647
KIAA0895	ENSG00000164542
KIAA1217	ENSG00000120549
KIAA1324	ENSG00000116299
KIAA1377	ENSG00000110318
KIFAP3	ENSG00000075945
KIRREL	ENSG00000183853
KITLG	ENSG00000049130
KLF10	ENSG00000155090
KLF17	ENSG00000171872
KLF4	ENSG00000136826
KLF5	ENSG00000102554
KLF7	ENSG00000118263
KLF9	ENSG00000119138
KLHDC8B	ENSG00000185909
KLHL22	ENSG00000099910
KLHL35	ENSG00000149243
KRBOX1	ENSG00000240747
L3HYPDH	ENSG00000126790
LAMA2	ENSG00000196569
LAMA3	ENSG00000053747
LAMB1	ENSG00000091136
LAPTM5	ENSG00000162511
LBX2-AS1	ENSG00000257702
LCAT	ENSG00000213398
LEPR	ENSG00000116678
LGALS3	ENSG00000131981
LIMCH1	ENSG00000064042
LIME1	ENSG00000203896
LIMS2	ENSG00000072163
LIN37	ENSG00000267796
LINC00342	ENSG00000232931
LINC00346	ENSG00000255874
LINC00511	ENSG00000227036
LINC00654	ENSG00000205181
LINC00674	ENSG00000237854
LINC00883	ENSG00000243701
LINC00899	ENSG00000231711
LINC00910	ENSG00000188825
LINC00936	ENSG00000271614
LINC00963	ENSG00000204054
LINC01003	ENSG00000261455
LINC01116	ENSG00000163364
LINC01117	ENSG00000224577
LINC01133	ENSG00000224259
LINC01137	ENSG00000233621
LINC01168	ENSG00000240707
LINC01184	ENSG00000245937
LIPC	ENSG00000166035
LRCH1	ENSG00000136141
LRRC17	ENSG00000128606
LRRC23	ENSG00000010626
LRRC29	ENSG00000125122
LUM	ENSG00000139329
LURAP1L	ENSG00000153714
LY6E	ENSG00000160932
LY6G5C	ENSG00000204428
LY96	ENSG00000154589
MALAT1	ENSG00000251562
MAPK11	ENSG00000185386
MAPKAPK2	ENSG00000162889
MASP1	ENSG00000127241
MAST2	ENSG00000086015
ME1	ENSG00000065833
ME3	ENSG00000151376
MED15	ENSG00000099917
MEIS2	ENSG00000134138
MEOX2	ENSG00000106511
MESP1	ENSG00000166823
MFAP5	ENSG00000197614
MICAL1	ENSG00000135596
MICALL1	ENSG00000100139
MICALL2	ENSG00000164877
MID2	ENSG00000080561
MIR22HG	ENSG00000186594
MIR503HG	ENSG00000223749
MIRLET7BHG	ENSG00000197182
MKX	ENSG00000150051
MLKL	ENSG00000168404
MLLT3	ENSG00000171843
MLLT6	ENSG00000275023
MMP19	ENSG00000123342
MOCS2	ENSG00000164172
MPG	ENSG00000103152
MRPL24	ENSG00000143314
MRPL40	ENSG00000185608
MSC	ENSG00000178860
MSH5	ENSG00000204410
MSL3	ENSG00000005302
MT1A	ENSG00000205362
MTURN	ENSG00000180354
MXRA5	ENSG00000101825
MZT2B	ENSG00000152082
N6AMT2	ENSG00000150456
NAA38	ENSG00000183011
NACAD	ENSG00000136274
NBPF15	ENSG00000266338
NBPF8	ENSG00000162825
NCALD	ENSG00000104490
NCAM1	ENSG00000149294
NCF2	ENSG00000116701
NCKAP5	ENSG00000176771
NDUFAF3	ENSG00000178057
NEAT1	ENSG00000245532
NETO2	ENSG00000171208
NFATC1	ENSG00000131196
NFATC2	ENSG00000101096
NFE2L2	ENSG00000116044
NFIA	ENSG00000162599
NFKB1	ENSG00000109320
NFKB2	ENSG00000077150
NFKBIA	ENSG00000100906
NFKBIZ	ENSG00000144802
NGEF	ENSG00000066248
NID2	ENSG00000087303
NMI	ENSG00000123609
NNT	ENSG00000112992
NNT-AS1	ENSG00000248092
NOG	ENSG00000183691
NOV	ENSG00000136999
NPHP4	ENSG00000131697
NR3C2	ENSG00000151623
NR4A1	ENSG00000123358
NRBP2	ENSG00000185189
NSMAF	ENSG00000035681
NTN4	ENSG00000074527
NUDT18	ENSG00000275074
NUDT19	ENSG00000213965
NUPR1	ENSG00000176046
OAF	ENSG00000184232
OLFML1	ENSG00000183801
OLFML3	ENSG00000116774
OPRL1	ENSG00000125510
ORAI3	ENSG00000175938
OSCP1	ENSG00000116885
OSR2	ENSG00000164920
OXSM	ENSG00000151093
PAF1	ENSG00000006712
PALLD	ENSG00000129116
PARVB	ENSG00000188677
PAX8	ENSG00000125618
PAX8-AS1	ENSG00000189223
PBX4	ENSG00000105717
PCDH9	ENSG00000184226
PCED1A	ENSG00000132635
PCOLCE	ENSG00000106333
PCOLCE-AS1	ENSG00000224729
PDCD4	ENSG00000150593
PDE4D	ENSG00000113448
PDGFC	ENSG00000145431
PDGFRB	ENSG00000113721
PDK4	ENSG00000004799
PDP1	ENSG00000164951
PDZRN3	ENSG00000121440
PEAR1	ENSG00000187800
PENK	ENSG00000181195
PER2	ENSG00000132326
PEX6	ENSG00000124587
PGR	ENSG00000082175
PHF2	ENSG00000197724
PHLDA1	ENSG00000139289
PHLDA3	ENSG00000174307
PI16	ENSG00000164530
PID1	ENSG00000153823
PIGP	ENSG00000185808
PITX1	ENSG00000069011
PKP1	ENSG00000081277
PLA2G4A	ENSG00000116711
PLAGL1	ENSG00000118495
PLCB1	ENSG00000182621
PLCD1	ENSG00000187091
PLCD3	ENSG00000161714
PLCE1	ENSG00000138193
PLD1	ENSG00000075651
PLEKHG5	ENSG00000171680
PLGRKT	ENSG00000107020
PLIN2	ENSG00000147872
PLK2	ENSG00000145632
PLK3	ENSG00000173846
PLLP	ENSG00000102934
PLSCR4	ENSG00000114698
PLXND1	ENSG00000004399
PMP22	ENSG00000109099
POLD4	ENSG00000175482
POSTN	ENSG00000133110
PPIC	ENSG00000168938
PPP1R3E	ENSG00000235194
PQLC1	ENSG00000122490
PRDM1	ENSG00000057657
PRELP	ENSG00000188783
PRIMPOL	ENSG00000164306
PROCR	ENSG00000101000
PROS1	ENSG00000184500
PRR14	ENSG00000156858
PRR34	ENSG00000182257
PRR34-AS1	ENSG00000241990
PRSS12	ENSG00000164099
PRSS23	ENSG00000150687
PSMD9	ENSG00000110801
PTEN	ENSG00000171862
PTH1R	ENSG00000160801
PTHLH	ENSG00000087494
PTPDC1	ENSG00000158079
PTPRB	ENSG00000127329
PTPRM	ENSG00000173482
PTRH1	ENSG00000187024
PYGO1	ENSG00000171016
R3HDM2	ENSG00000179912
RAB40B	ENSG00000141542
RAD23A	ENSG00000179262
RAET1E	ENSG00000164520
RAI1	ENSG00000108557
RALGDS	ENSG00000160271
RAPGEF3	ENSG00000079337
RARRES1	ENSG00000118849
RASSF9	ENSG00000198774
RBM3	ENSG00000102317
RBMS3	ENSG00000144642
RBMS3-AS3	ENSG00000235904
RCCD1	ENSG00000166965
REEP4	ENSG00000168476
RELL1	ENSG00000181826
REV3L	ENSG00000009413
RFTN2	ENSG00000162944
RGAG4	ENSG00000242732
RGCC	ENSG00000102760
RGL1	ENSG00000143344
RGS10	ENSG00000148908
RGS11	ENSG00000076344
RGS20	ENSG00000147509
RHD	ENSG00000187010
RHOB	ENSG00000143878
RHOJ	ENSG00000126785
RHOU	ENSG00000116574
RILPL2	ENSG00000150977
RNF103-CHMP3	ENSG00000249884
RNF152	ENSG00000176641
RNF217	ENSG00000146373
ROM1	ENSG00000149489
RORA	ENSG00000069667
RP1-102E24.8	ENSG00000256433
RP1-151F17.2	ENSG00000272341
RP1-170O19.22	ENSG00000273433
RP1-170O19.23	ENSG00000272801
RP1-178F15.5	ENSG00000271853
RP1-197B17.3	ENSG00000257433
RP1-69D17.3	ENSG00000233351
RP11-1055B8.8	ENSG00000263271
RP11-106M3.2	ENSG00000260729
RP11-106M3.3	ENSG00000261460
RP11-1100L3.8	ENSG00000259884
RP11-116D17.3	ENSG00000271579
RP11-123K3.4	ENSG00000258830
RP11-128A17.1	ENSG00000259460
RP11-147L13.12	ENSG00000274561
RP11-147L13.13	ENSG00000277476
RP11-150O12.6	ENSG00000253414
RP11-154J22.1	ENSG00000259488
RP11-170N16.3	ENSG00000273007
RP11-175K6.1	ENSG00000245812
RP11-175K6.2	ENSG00000279204
RP11-178L8.4	ENSG00000131152
RP11-17A4.2	ENSG00000254254
RP11-190A12.8	ENSG00000272668
RP11-195F19.9	ENSG00000230074
RP11-19E11.1	ENSG00000258910
RP11-20I20.4	ENSG00000273179
RP11-218E20.5	ENSG00000258745
RP11-23P13.4	ENSG00000250379
RP11-27M24.1	ENSG00000256013
RP11-286E11.1	ENSG00000245293
RP11-290L1.3	ENSG00000257453
RP11-295G20.2	ENSG00000233461
RP11-330O11.3	ENSG00000272914
RP11-336K24.12	ENSG00000273002
RP11-337C18.8	ENSG00000237188
RP11-344N10.5	ENSG00000272630
RP11-345J18.2	ENSG00000274307
RP11-361L15.3	ENSG00000280416
RP11-361L15.4	ENSG00000265408
RP11-366L20.2	ENSG00000197301
RP11-378A13.2	ENSG00000273361
RP11-383C5.3	ENSG00000228021
RP11-385D13.1	ENSG00000251537
RP11-3B7.1	ENSG00000225399
RP11-407G23.7	ENSG00000276663
RP11-412D9.4	ENSG00000260329
RP11-418J17.1	ENSG00000231365
RP11-428J1.5	ENSG00000272142
RP11-42O4.2	ENSG00000278367
RP11-434D12.1	ENSG00000268279
RP11-44F14.7	ENSG00000279344
RP11-463O12.3	ENSG00000256152
RP11-463O12.5	ENSG00000280138
RP11-493E12.3	ENSG00000274769
RP11-497E19.1	ENSG00000205562
RP11-497E19.2	ENSG00000258945
RP11-4O1.2	ENSG00000259953
RP11-538P18.2	ENSG00000243150
RP11-552F3.9	ENSG00000267801
RP11-553L6.5	ENSG00000259976
RP11-566K11.7	ENSG00000267048
RP11-572N21.1	ENSG00000280414
RP11-620J15.3	ENSG00000257698
RP11-627J17.1	ENSG00000272149
RP11-65I12.1	ENSG00000274877
RP11-665G4.1	ENSG00000249252
RP11-69I8.3	ENSG00000227220
RP11-720L2.3	ENSG00000264433
RP11-720L2.4	ENSG00000264514
RP11-732A19.5	ENSG00000255390
RP11-732A19.9	ENSG00000255680
RP11-73M7.6	ENSG00000235790
RP11-789C17.5	ENSG00000263970
RP11-849N15.3	ENSG00000279660
RP11-876N24.3	ENSG00000280153
RP11-87C12.2	ENSG00000256950
RP11-95P13.1	ENSG00000230024
RP11-961A15.1	ENSG00000262791
RP11-977G19.5	ENSG00000258199
RP3-330M21.5	ENSG00000245261
RP3-395M20.8	ENSG00000238164
RP4-671O14.6	ENSG00000280434
RP4-678D15.1	ENSG00000271774
RP4-781K5.2	ENSG00000228830
RP4-798P15.3	ENSG00000254154
RP5-1009E24.8	ENSG00000275491
RP5-1009E24.9	ENSG00000274949
RP5-1021I20.1	ENSG00000259065
RP5-1112D6.8	ENSG00000272356
RP5-991G20.1	ENSG00000259768
RPS6KA5	ENSG00000100784
RRAD	ENSG00000166592
RSPO3	ENSG00000146374
RSRP1	ENSG00000117616
RUNX2	ENSG00000124813
RWDD2B	ENSG00000156253
S100A10	ENSG00000197747
S100A11	ENSG00000163191
S100A13	ENSG00000189171
S100A16	ENSG00000188643
S100A2	ENSG00000196754
S100A3	ENSG00000188015
S100A4	ENSG00000196154
S100A5	ENSG00000196420
S100A6	ENSG00000197956
SAMD5	ENSG00000203727
SATB2-AS1	ENSG00000225953
SCUBE2	ENSG00000175356
SDPR	ENSG00000168497
SDSL	ENSG00000139410
SEC16B	ENSG00000120341
SENCR	ENSG00000254703
SENP7	ENSG00000138468
2005-09-01	ENSG00000184702
2006-09-01	ENSG00000125354
SERP2	ENSG00000151778
SERPINB6	ENSG00000124570
SETBP1	ENSG00000152217
SETD8	ENSG00000183955
SGK1	ENSG00000118515
SGMS2	ENSG00000164023
SH3BP4	ENSG00000130147
SH3BP5	ENSG00000131370
SH3BP5-AS1	ENSG00000224660
SH3RF3-AS1	ENSG00000259863
SIM2	ENSG00000159263
SLC10A7	ENSG00000120519
SLC12A6	ENSG00000140199
SLC25A16	ENSG00000122912
SLC35D2	ENSG00000130958
SLC35F6	ENSG00000213699
SLC38A5	ENSG00000017483
SLC46A3	ENSG00000139508
SLIT3	ENSG00000184347
SMPDL3A	ENSG00000172594
SMYD2	ENSG00000143499
SNAPIN	ENSG00000143553
SNCG	ENSG00000173267
SOAT2	ENSG00000167780
SP9	ENSG00000217236
SPACA6P	ENSG00000182310
SPATA18	ENSG00000163071
SPATA20	ENSG00000006282
SPEF2	ENSG00000152582
SPESP1	ENSG00000258484
SPHK1	ENSG00000176170
SPHKAP	ENSG00000153820
SPON2	ENSG00000159674
SPOP	ENSG00000121067
SPRED2	ENSG00000198369
SPTLC3	ENSG00000172296
SSBP4	ENSG00000130511
ST3GAL1	ENSG00000008513
ST3GAL4	ENSG00000110080
STAT2	ENSG00000170581
STK10	ENSG00000072786
STK32B	ENSG00000152953
STK38	ENSG00000112079
STK39	ENSG00000198648
STMN2	ENSG00000104435
STOM	ENSG00000148175
STX11	ENSG00000135604
SUCLG1	ENSG00000163541
SULT1B1	ENSG00000173597
SYBU	ENSG00000147642
SYCP2	ENSG00000196074
SYCP3	ENSG00000139351
SYTL4	ENSG00000102362
SZT2	ENSG00000198198
SZT2-AS1	ENSG00000229372
TBX1	ENSG00000184058
TBX15	ENSG00000092607
TCF25	ENSG00000141002
TCTEX1D1	ENSG00000152760
TCTEX1D2	ENSG00000213123
TDRD9	ENSG00000156414
TECPR1	ENSG00000205356
TENC1	ENSG00000111077
TET2	ENSG00000168769
THRB	ENSG00000151090
TIFA	ENSG00000145365
TLCD2	ENSG00000185561
TM9SF1	ENSG00000100926
TMC7	ENSG00000170537
TMEM106C	ENSG00000134291
TMEM109	ENSG00000110108
TMEM117	ENSG00000139173
TMEM14A	ENSG00000096092
TMEM155	ENSG00000164112
TMEM204	ENSG00000131634
TMEM220	ENSG00000187824
TMSB10	ENSG00000034510
TMSB4X	ENSG00000205542
TNFAIP2	ENSG00000185215
TNFAIP3	ENSG00000118503
TNFAIP6	ENSG00000123610
TNFRSF14	ENSG00000157873
TNFRSF19	ENSG00000127863
TNFRSF25	ENSG00000215788
TNFSF4	ENSG00000117586
TNXB	ENSG00000168477
TPGS1	ENSG00000141933
TPPP3	ENSG00000159713
TPRA1	ENSG00000163870
TPT1-AS1	ENSG00000170919
TPTEP1	ENSG00000100181
TRAK1	ENSG00000182606
TREX1	ENSG00000213689
TRIM38	ENSG00000112343
TRIM69	ENSG00000185880
TRIM7	ENSG00000146054
TRPS1	ENSG00000104447
TSHZ1	ENSG00000179981
TSHZ2	ENSG00000182463
TUSC1	ENSG00000198680
TWIST1	ENSG00000122691
TYK2	ENSG00000105397
UBALD2	ENSG00000185262
UCN2	ENSG00000145040
UGGT2	ENSG00000102595
USP3	ENSG00000140455
UTS2B	ENSG00000188958
UXT	ENSG00000126756
UXT-AS1	ENSG00000267064
VAX2	ENSG00000116035
VPS11	ENSG00000160695
VPS16	ENSG00000215305
VPS28	ENSG00000160948
VPS37B	ENSG00000139722
WBSCR27	ENSG00000165171
WDFY3-AS2	ENSG00000180769
WDFY4	ENSG00000128815
WDR13	ENSG00000101940
WDR45	ENSG00000196998
WDR78	ENSG00000152763
WFDC3	ENSG00000124116
WISP1	ENSG00000104415
WISP1-OT1	ENSG00000270132
WNT3	ENSG00000108379
WNT9A	ENSG00000143816
XPA	ENSG00000136936
XPC	ENSG00000154767
XXbac-B461K10.4	ENSG00000093100
XXbac-BPG252P9.10	ENSG00000272273
YAF2	ENSG00000015153
ZADH2	ENSG00000180011
ZBTB20	ENSG00000181722
ZBTB22	ENSG00000236104
ZBTB42	ENSG00000179627
ZC3H12D	ENSG00000178199
ZC3H6	ENSG00000188177
ZFAND2B	ENSG00000158552
ZFHX3	ENSG00000140836
ZFP36	ENSG00000128016
ZFPM2	ENSG00000169946
ZFYVE19	ENSG00000166140
ZMAT3	ENSG00000172667
ZMAT5	ENSG00000100319
ZNF343	ENSG00000088876
ZNF385D	ENSG00000151789
ZNF436	ENSG00000125945
ZNF436-AS1	ENSG00000249087
ZNF438	ENSG00000183621
ZNF487	ENSG00000243660
ZNF524	ENSG00000171443
ZNF546	ENSG00000187187
ZNF584	ENSG00000171574
ZNF596	ENSG00000172748
ZNF624	ENSG00000197566
ZNF688	ENSG00000229809
ZNF70	ENSG00000187792
ZNF703	ENSG00000183779
ZNF75D	ENSG00000186376
ZNF823	ENSG00000197933
ZNF83	ENSG00000167766
ZSWIM8	ENSG00000214655
ZSWIM8-AS1	ENSG00000272589

## Sheet: Persistently expressed
Gene	ID
ABCA2	ENSG00000107331
AC000403.4	ENSG00000278727
AC005775.2	ENSG00000266933
AC006547.14	ENSG00000234409
AC007283.5	ENSG00000234431
AC016738.4	ENSG00000223947
AC025165.8	ENSG00000224713
AC025335.1	ENSG00000179859
AC079305.10	ENSG00000222043
AC092066.1	ENSG00000279095
AC093673.5	ENSG00000232533
AC104532.2	ENSG00000267314
AC114730.8	ENSG00000215692
ACTA2	ENSG00000107796
ACTA2-AS1	ENSG00000180139
ADAM15	ENSG00000143537
ADARB1	ENSG00000197381
ADCY6	ENSG00000174233
AF127577.10	ENSG00000229047
AGFG2	ENSG00000106351
ANGPT1	ENSG00000154188
ANKRD34A	ENSG00000272031
ANKRD53	ENSG00000144031
ANO4	ENSG00000151572
APOL1	ENSG00000100342
ARFRP1	ENSG00000101246
ARHGEF25	ENSG00000240771
ARSA	ENSG00000100299
ARSD	ENSG00000006756
ARSD-AS1	ENSG00000229851
ARSG	ENSG00000141337
ATE1-AS1	ENSG00000226864
ATG4A	ENSG00000101844
ATP10A	ENSG00000206190
ATP10D	ENSG00000145246
ATP7A	ENSG00000165240
B2M	ENSG00000166710
B3GALNT1	ENSG00000169255
B4GALNT1	ENSG00000135454
BACE2	ENSG00000182240
BCL10	ENSG00000142867
BLOC1S3	ENSG00000189114
BTN3A1	ENSG00000026950
BTN3A2	ENSG00000186470
BTN3A3	ENSG00000111801
BVES	ENSG00000112276
C16orf58	ENSG00000140688
C16orf74	ENSG00000154102
C17orf61-PLSCR3	ENSG00000262481
C1orf204	ENSG00000188004
C1orf53	ENSG00000203724
C22orf23	ENSG00000128346
C4orf48	ENSG00000243449
C5orf56	ENSG00000197536
C9orf89	ENSG00000165233
CACNA1C	ENSG00000151067
CAPN12	ENSG00000182472
CAPN3	ENSG00000092529
CBLN3	ENSG00000139899
CBX4	ENSG00000141582
CBX6	ENSG00000183741
CCDC176	ENSG00000119636
CCDC96	ENSG00000173013
CCPG1	ENSG00000260916
CD226	ENSG00000150637
CD81	ENSG00000110651
CD81-AS1	ENSG00000238184
CDH11	ENSG00000140937
CDKN1A	ENSG00000124762
CES4A	ENSG00000172824
CFLAR	ENSG00000003402
CH17-340M24.1	ENSG00000279563
CHIC2	ENSG00000109220
CIART	ENSG00000159208
CLIC3	ENSG00000169583
COL10A1	ENSG00000123500
COL12A1	ENSG00000111799
COL1A1	ENSG00000108821
COL1A2	ENSG00000164692
COL5A1	ENSG00000130635
COL5A3	ENSG00000080573
COL6A1	ENSG00000142156
COX7A1	ENSG00000161281
CPEB2	ENSG00000137449
CPQ	ENSG00000104324
CRELD1	ENSG00000163703
CRIP2	ENSG00000182809
CROT	ENSG00000005469
CRYAB	ENSG00000109846
CSF1	ENSG00000184371
CSGALNACT1	ENSG00000147408
CTB-25B13.12	ENSG00000267317
CTB-46B19.2	ENSG00000249593
CTC-338M12.5	ENSG00000250222
CTD-2012K14.8	ENSG00000276075
CTD-2033D15.1	ENSG00000259279
CTD-2033D15.3	ENSG00000278621
CTD-2228K2.7	ENSG00000225138
CTD-2524L6.3	ENSG00000260037
CTD-2541J13.1	ENSG00000260578
CTD-2619J13.14	ENSG00000232098
CTD-3252C9.4	ENSG00000267519
CUL7	ENSG00000044090
CYB5D2	ENSG00000167740
CYP26B1	ENSG00000003137
DACT3	ENSG00000197380
DBNL	ENSG00000136279
DGKA	ENSG00000065357
DHRS1	ENSG00000157379
DIP2C	ENSG00000151240
DKFZP434A062	ENSG00000262075
DLGAP4-AS1	ENSG00000232907
DLX2	ENSG00000115844
DNAJB2	ENSG00000135924
DNAJC22	ENSG00000178401
DPP4	ENSG00000197635
DPP7	ENSG00000176978
DST	ENSG00000151914
DYX1C1-CCPG1	ENSG00000261771
EDNRA	ENSG00000151617
EMILIN1	ENSG00000138080
EML2	ENSG00000125746
EN1	ENSG00000163064
ESAM	ENSG00000149564
EVA1B	ENSG00000142694
FAM174A	ENSG00000174132
FAM177A1	ENSG00000151327
FAM65C	ENSG00000042062
FAM71F2	ENSG00000205085
FAT4	ENSG00000196159
FBLN2	ENSG00000163520
FBXL2	ENSG00000153558
FBXL8	ENSG00000135722
FBXO32	ENSG00000156804
FGFRL1	ENSG00000127418
FKBP10	ENSG00000141756
FKBP9	ENSG00000122642
FLYWCH1	ENSG00000059122
FNDC4	ENSG00000115226
FRMPD4	ENSG00000169933
GAD1	ENSG00000128683
GADD45A	ENSG00000116717
GALNT5	ENSG00000136542
GATA2	ENSG00000179348
GATA2-AS1	ENSG00000244300
GBP4	ENSG00000162654
GDPD3	ENSG00000102886
GGN	ENSG00000179168
GLIS3-AS1	ENSG00000237009
GLRX	ENSG00000173221
GPSM1	ENSG00000160360
GREB1L	ENSG00000141449
GRIK2	ENSG00000164418
GRINA	ENSG00000178719
GS1-259H13.2	ENSG00000244219
GSTK1	ENSG00000197448
GSTM2	ENSG00000213366
GSTM3	ENSG00000134202
GUK1	ENSG00000143774
GYPE	ENSG00000197465
HABP4	ENSG00000130956
HHIP	ENSG00000164161
HHIP-AS1	ENSG00000248890
HHIPL1	ENSG00000182218
HLA-A	ENSG00000206503
HLA-B	ENSG00000234745
HLA-C	ENSG00000204525
HOTAIRM1	ENSG00000233429
HOXC11	ENSG00000123388
HSF4	ENSG00000102878
HSPA1A	ENSG00000204389
HSPB3	ENSG00000169271
HSPG2	ENSG00000142798
ID1	ENSG00000125968
IDUA	ENSG00000127415
IER5L	ENSG00000188483
IFI27L2	ENSG00000119632
IFI6	ENSG00000126709
IFIH1	ENSG00000115267
IGFBP7	ENSG00000163453
IGFBP7-AS1	ENSG00000245067
IL11RA	ENSG00000137070
IL1B	ENSG00000125538
IMPDH1	ENSG00000106348
INF2	ENSG00000203485
ITFG1	ENSG00000129636
ITGA11	ENSG00000137809
KLHDC1	ENSG00000197776
KRT80	ENSG00000167767
LAMA4	ENSG00000112769
LAMB2	ENSG00000172037
LAMC1	ENSG00000135862
LBX2	ENSG00000179528
LDLRAD2	ENSG00000187942
LEPROT	ENSG00000213625
LIN7B	ENSG00000104863
LINC-PINT	ENSG00000231721
LINC00152	ENSG00000222041
LINC00847	ENSG00000245060
LINC00942	ENSG00000249628
LINC01111	ENSG00000254300
LINC01305	ENSG00000231453
LINC01352	ENSG00000238078
LINC01436	ENSG00000231106
LOXL4	ENSG00000138131
LPAR1	ENSG00000198121
LPIN3	ENSG00000132793
LTBP3	ENSG00000168056
LTBR	ENSG00000111321
LTK	ENSG00000062524
LXN	ENSG00000079257
LZTR1	ENSG00000099949
MAN2A2	ENSG00000196547
MAP1B	ENSG00000131711
MAP1LC3A	ENSG00000101460
MAPRE3	ENSG00000084764
MARVELD1	ENSG00000155254
MBNL1-AS1	ENSG00000229619
MEDAG	ENSG00000102802
MEF2C	ENSG00000081189
MEI1	ENSG00000167077
MIA-RAB4B	ENSG00000268975
MIR143HG	ENSG00000249669
MMP2	ENSG00000087245
MMP24-AS1	ENSG00000126005
MOB3C	ENSG00000142961
MRAS	ENSG00000158186
MROH1	ENSG00000179832
MTFR1L	ENSG00000117640
MTMR11	ENSG00000014914
NACC2	ENSG00000148411
NDUFA4L2	ENSG00000185633
NGFR	ENSG00000064300
NKX6-1	ENSG00000163623
NLRC5	ENSG00000140853
NMNAT1	ENSG00000173614
NNMT	ENSG00000166741
NOL3	ENSG00000140939
NPAS2	ENSG00000170485
NR1H2	ENSG00000131408
NR4A2	ENSG00000153234
NRIP1	ENSG00000180530
NTNG2	ENSG00000196358
NUCB1	ENSG00000104805
NUCB1-AS1	ENSG00000235191
OAS2	ENSG00000111335
ODF3B	ENSG00000177989
OS9	ENSG00000135506
OSMR	ENSG00000145623
P2RX6	ENSG00000099957
PALMD	ENSG00000099260
PARP12	ENSG00000059378
PARP9	ENSG00000138496
PCGF1	ENSG00000115289
PCOLCE2	ENSG00000163710
PDK2	ENSG00000005882
PDLIM4	ENSG00000131435
PHEX	ENSG00000102174
PIGZ	ENSG00000119227
PKD1	ENSG00000008710
PLEKHH3	ENSG00000068137
PLXNB3	ENSG00000198753
PODNL1	ENSG00000132000
PPARG	ENSG00000132170
PPP1R13L	ENSG00000104881
PPP1R3C	ENSG00000119938
PPP2R5B	ENSG00000068971
PRAF2	ENSG00000243279
PSMB8	ENSG00000204264
PSMB8-AS1	ENSG00000204261
PSTPIP2	ENSG00000152229
PTGER1	ENSG00000160951
PTGS2	ENSG00000073756
PTS	ENSG00000150787
PYROXD2	ENSG00000119943
RAB4B	ENSG00000167578
RGS3	ENSG00000138835
RHBDF1	ENSG00000007384
RILPL1	ENSG00000188026
RNASEL	ENSG00000135828
RP1-122P22.2	ENSG00000233895
RP1-142L7.5	ENSG00000237234
RP1-317E23.7	ENSG00000272478
RP11-1094H24.4	ENSG00000246640
RP11-1398P2.1	ENSG00000244459
RP11-164J13.1	ENSG00000258461
RP11-212I21.3	ENSG00000279030
RP11-229O3.1	ENSG00000278893
RP11-244H3.1	ENSG00000241014
RP11-247A12.2	ENSG00000204055
RP11-247A12.8	ENSG00000268050
RP11-266J6.2	ENSG00000269886
RP11-274B21.9	ENSG00000271344
RP11-304L19.1	ENSG00000259933
RP11-311C24.1	ENSG00000260772
RP11-324L17.1	ENSG00000272551
RP11-329J18.2	ENSG00000260281
RP11-34A14.3	ENSG00000230928
RP11-395B7.7	ENSG00000260336
RP11-395L14.18	ENSG00000279267
RP11-395N3.1	ENSG00000261379
RP11-399O19.9	ENSG00000261438
RP11-434B12.1	ENSG00000260837
RP11-455O6.8	ENSG00000276101
RP11-45M22.3	ENSG00000263624
RP11-469M7.1	ENSG00000260006
RP11-517I3.2	ENSG00000279118
RP11-54O7.3	ENSG00000223764
RP11-553A21.3	ENSG00000231652
RP11-554A11.4	ENSG00000261625
RP11-571M6.7	ENSG00000257342
RP11-579D7.2	ENSG00000257653
RP11-5A19.5	ENSG00000265690
RP11-5C23.1	ENSG00000272760
RP11-626G11.3	ENSG00000261759
RP11-73M18.8	ENSG00000269958
RP11-767N6.7	ENSG00000230896
RP11-81A22.4	ENSG00000280254
RP11-890B15.3	ENSG00000255455
RP11-923I11.3	ENSG00000260122
RP11-934B9.3	ENSG00000258973
RP11-972P1.7	ENSG00000280328
RP4-735C1.4	ENSG00000241720
RP4-751H13.7	ENSG00000273419
RP4-758J24.5	ENSG00000272091
RP5-1029K10.2	ENSG00000249906
RP5-1039K5.12	ENSG00000278948
RP5-1087E8.3	ENSG00000233706
RPS6KA2	ENSG00000071242
RTN4RL1	ENSG00000185924
RXRB	ENSG00000204231
SAT1	ENSG00000130066
SATL1	ENSG00000184788
SBNO2	ENSG00000064932
SCARF2	ENSG00000244486
SCN8A	ENSG00000196876
SGCD	ENSG00000170624
SGSH	ENSG00000181523
SH3D21	ENSG00000214193
SH3PXD2A	ENSG00000107957
SH3RF3	ENSG00000172985
SHB	ENSG00000107338
SIAE	ENSG00000110013
SIL1	ENSG00000120725
SIX1	ENSG00000126778
SLAMF8	ENSG00000158714
SLC12A4	ENSG00000124067
SLC17A9	ENSG00000101194
SLC22A18	ENSG00000110628
SLC25A20	ENSG00000178537
SLC25A28	ENSG00000155287
SLC26A1	ENSG00000145217
SLC26A10	ENSG00000135502
SLC27A1	ENSG00000130304
SLC30A4	ENSG00000104154
SLC5A2	ENSG00000140675
SLC9A3	ENSG00000066230
SLC9A3R2	ENSG00000065054
SLC9B2	ENSG00000164038
SLCO2A1	ENSG00000174640
SMOX	ENSG00000088826
SNED1	ENSG00000162804
SPAG8	ENSG00000137098
SQSTM1	ENSG00000161011
SRPK3	ENSG00000184343
ST3GAL5	ENSG00000115525
SULF1	ENSG00000137573
SYNPO2	ENSG00000172403
TAP1	ENSG00000168394
TAPBP	ENSG00000231925
TAPBPL	ENSG00000139192
TCTN1	ENSG00000204852
TEP1	ENSG00000129566
THBS1	ENSG00000137801
THBS3	ENSG00000169231
THSD4	ENSG00000187720
TM4SF1	ENSG00000169908
TMEM121	ENSG00000184986
TMEM154	ENSG00000170006
TMEM175	ENSG00000127419
TMEM187	ENSG00000177854
TMEM256-PLSCR3	ENSG00000187838
TMEM44	ENSG00000145014
TMEM59	ENSG00000116209
TMUB2	ENSG00000168591
TOR4A	ENSG00000198113
TPBG	ENSG00000146242
TRIM4	ENSG00000146833
TSEN34	ENSG00000170892
TSPO	ENSG00000100300
TTC3-AS1	ENSG00000228677
TTLL3	ENSG00000214021
TUBG2	ENSG00000037042
TXNIP	ENSG00000265972
TXNRD3	ENSG00000197763
U91328.21	ENSG00000272558
UBE2J1	ENSG00000198833
UBXN6	ENSG00000167671
VSIG2	ENSG00000019102
WLS	ENSG00000116729
WNT16	ENSG00000002745
WNT5A	ENSG00000114251
XG	ENSG00000124343
XXbac-B562F10.12	ENSG00000277971
YPEL5	ENSG00000119801
ZDHHC1	ENSG00000159714
ZDHHC8	ENSG00000099904
ZFP3	ENSG00000180787
ZMIZ1	ENSG00000108175
ZMYM6NB	ENSG00000243749
ZNF441	ENSG00000197044
ZNF491	ENSG00000177599
ZNF503	ENSG00000270087
ZNF862	ENSG00000106479
