# Supplementary figures and images for: Multi-omic rejuvenation of human cells by maturation phase transient reprogramming
Source: eLife journal article supplement (doi:10.7554/elife.71624), 2022-04-07

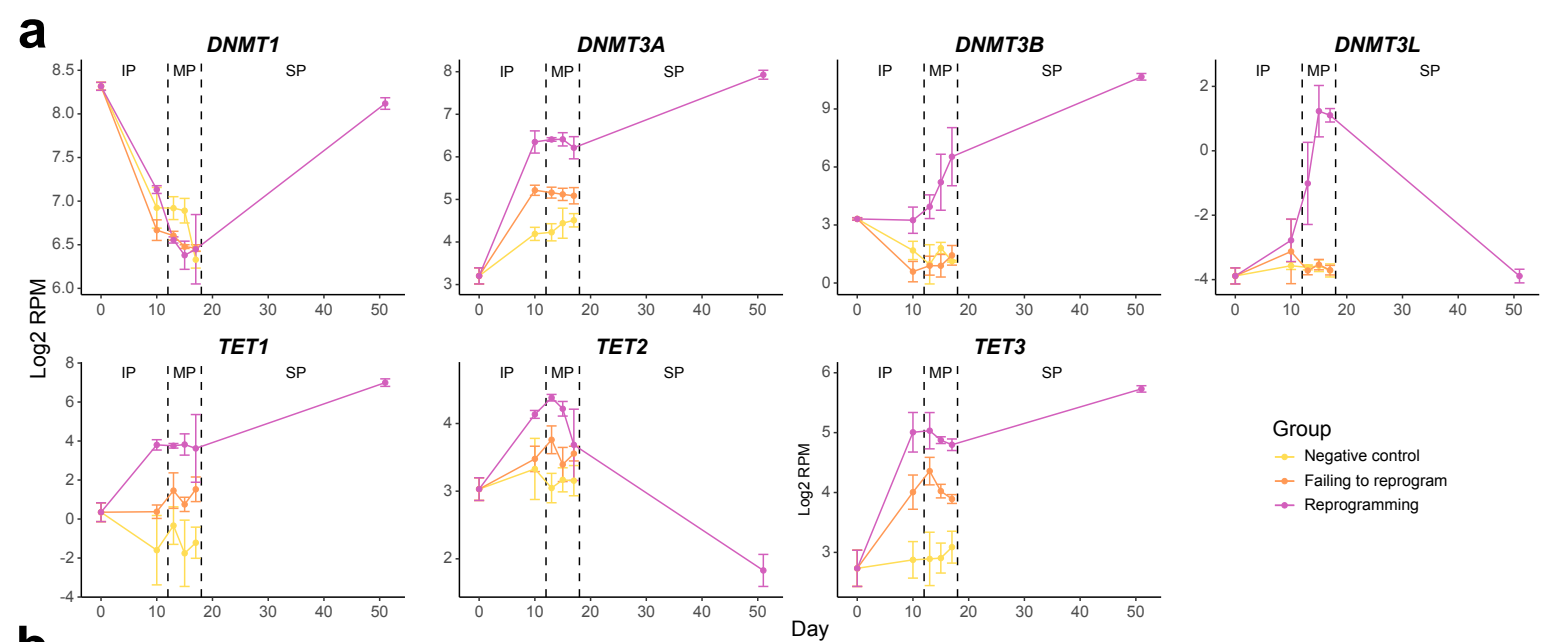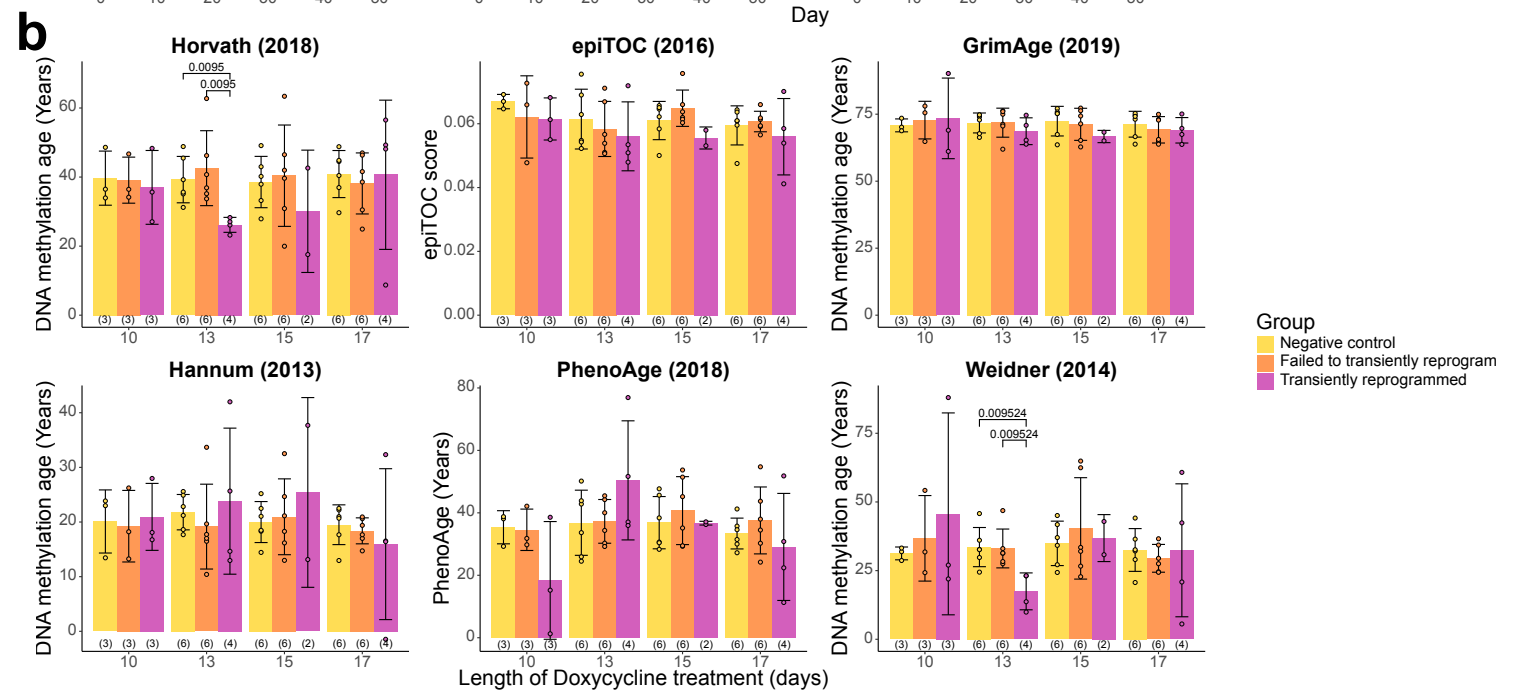

**c** Telomere length clock (Lu 2019) during reprogramming with tetO-GFP-hOKMS

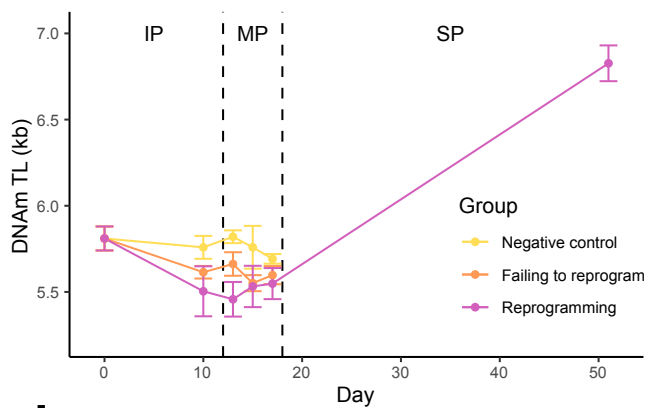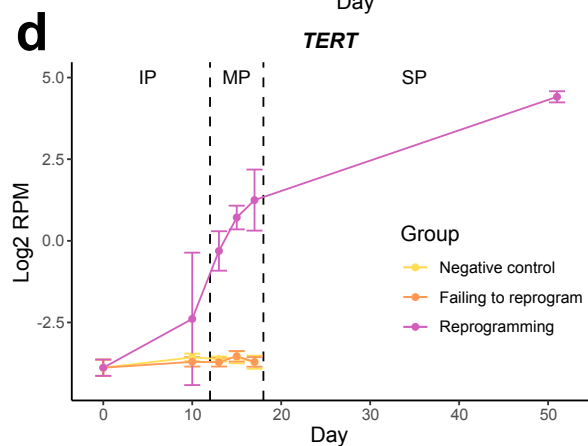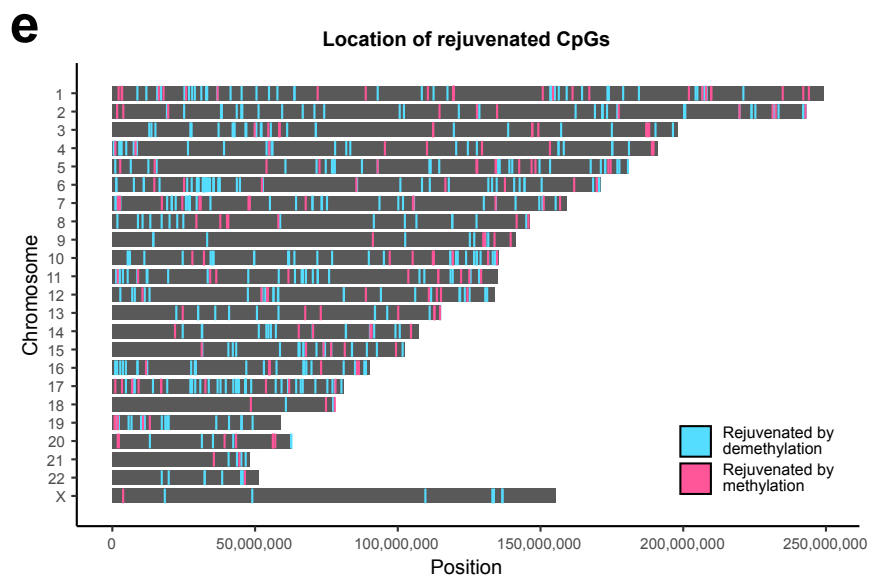

Supplement: supp [file elife-71624-supp-v1.zip]

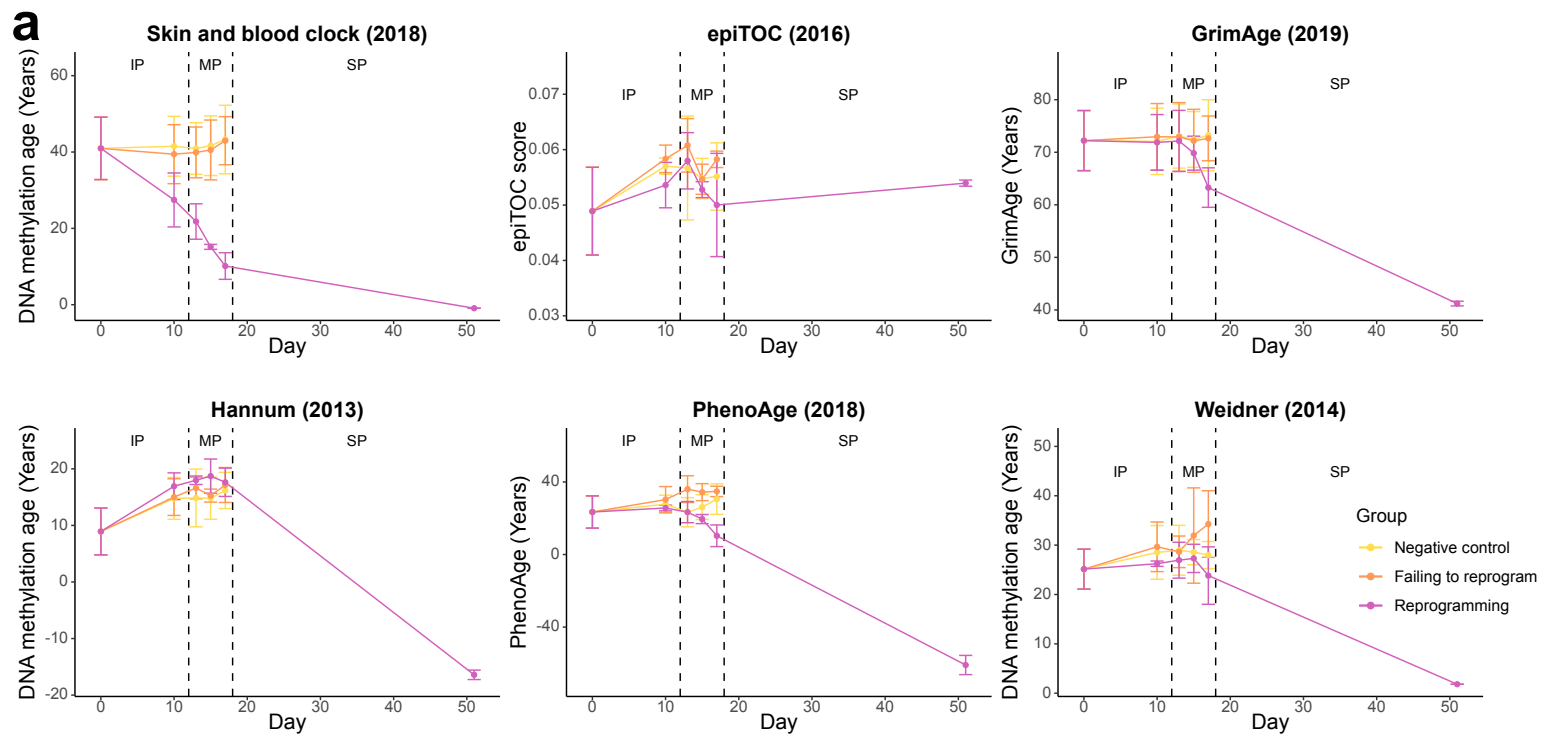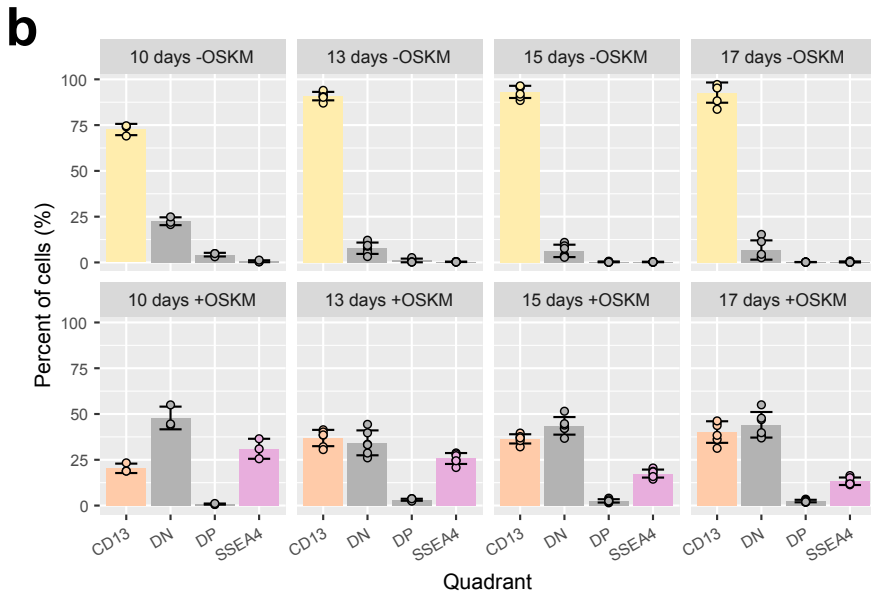

Sorting reprogramming cells

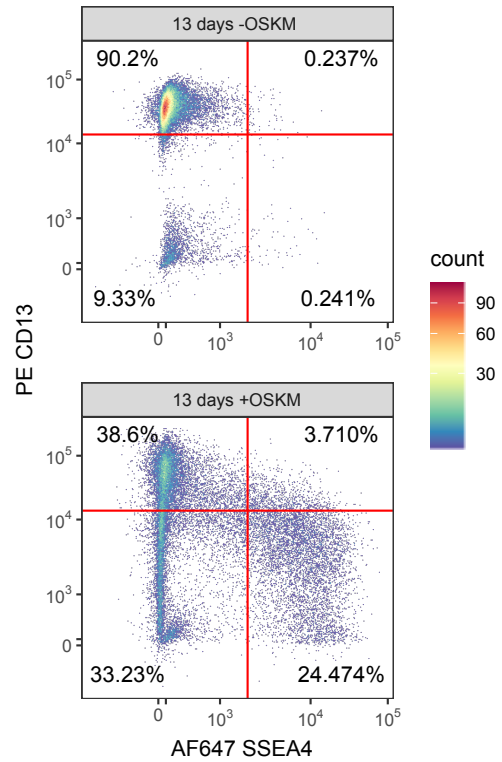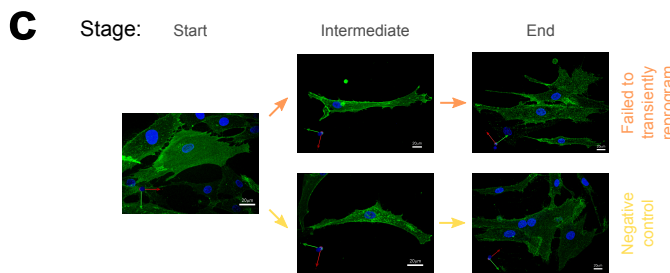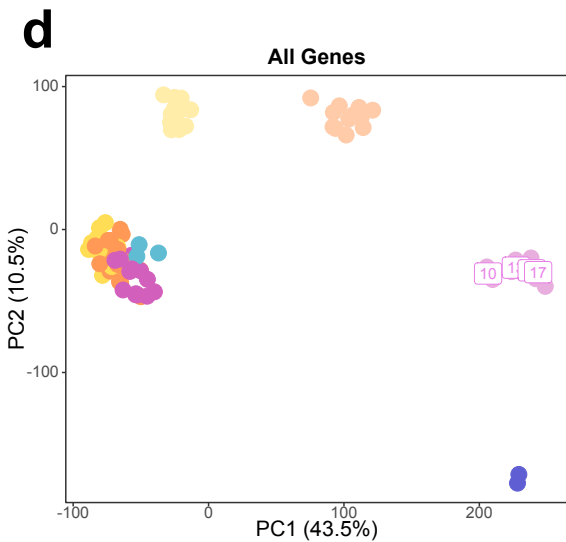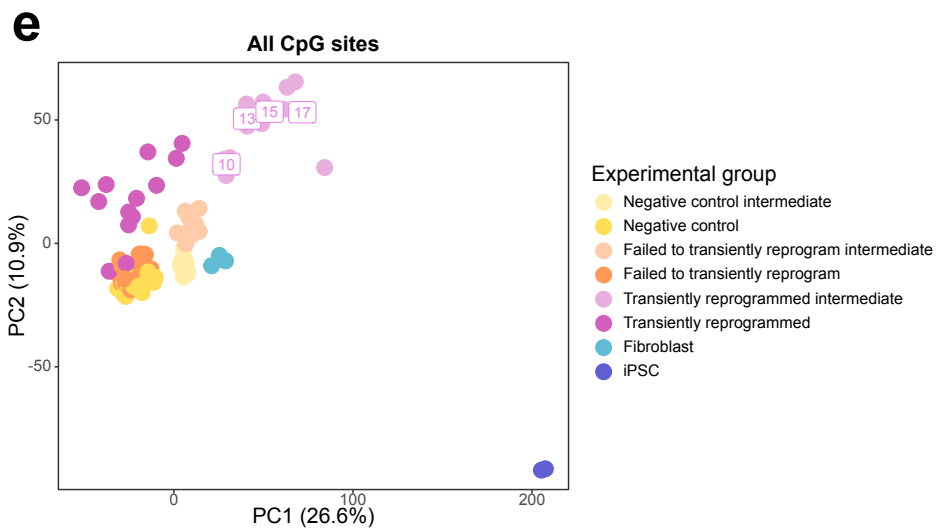

Supplement: supp [file elife-71624-supp-v1.zip]

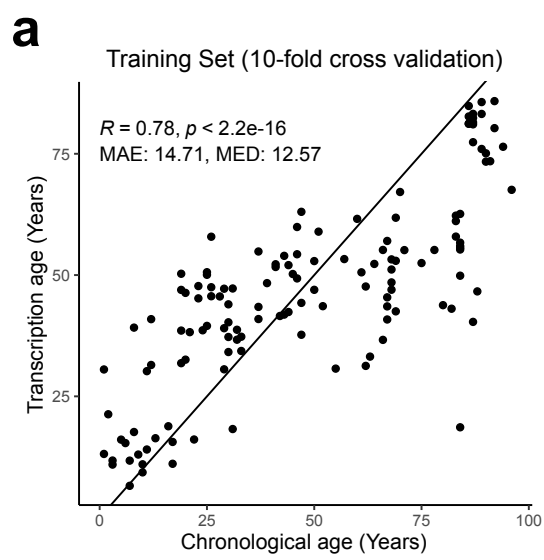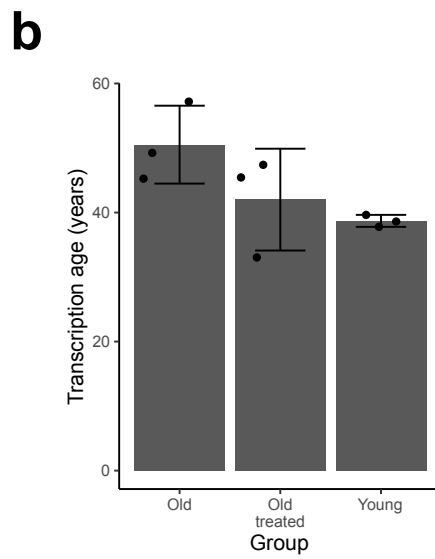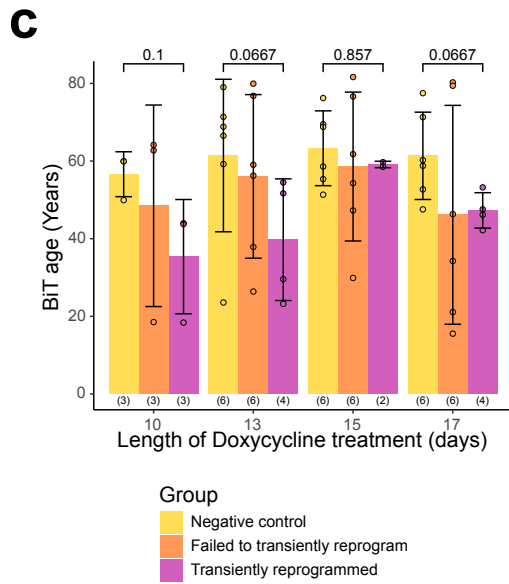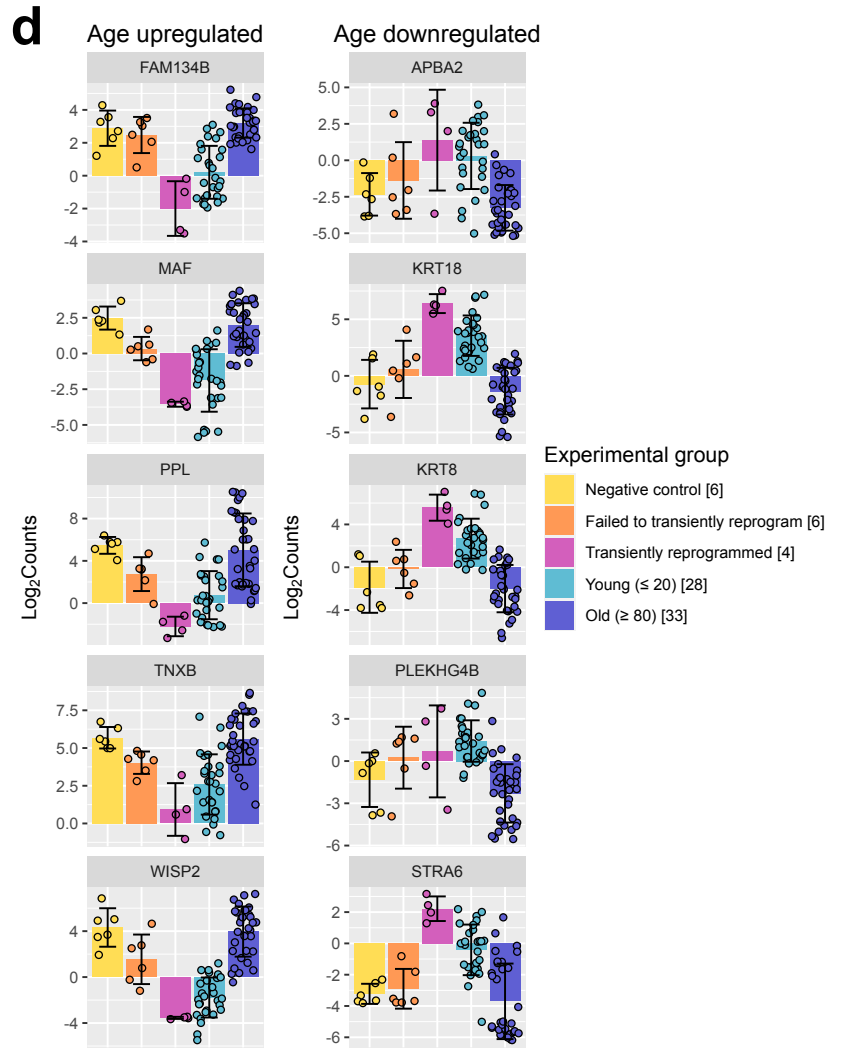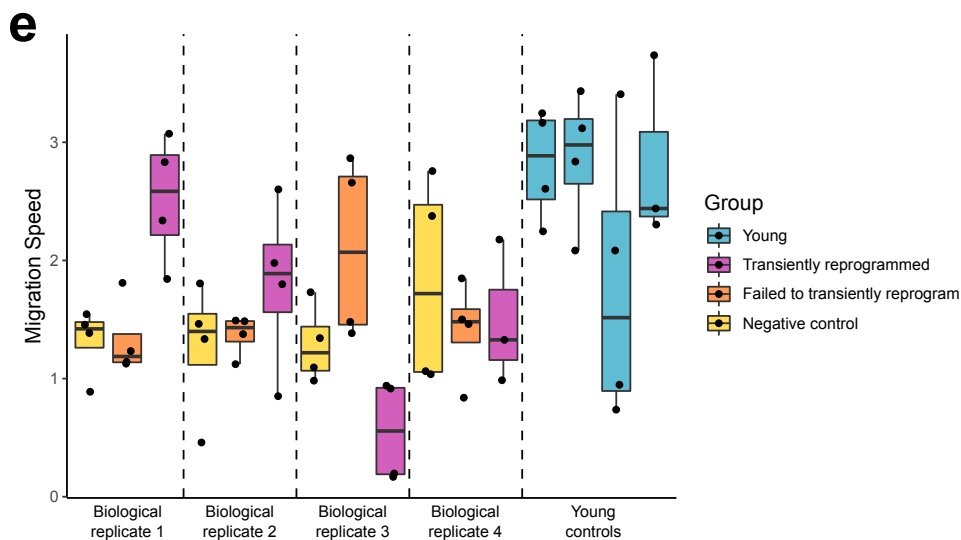

Supplement: supp [file elife-71624-supp-v1.zip]

**a**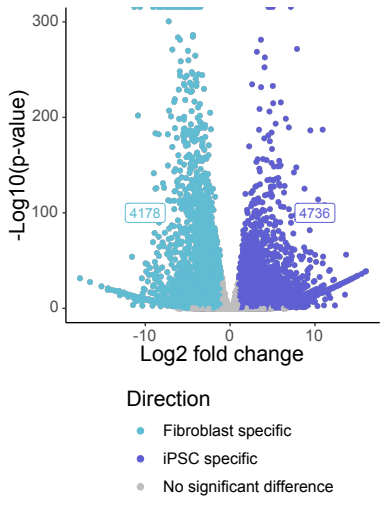**b**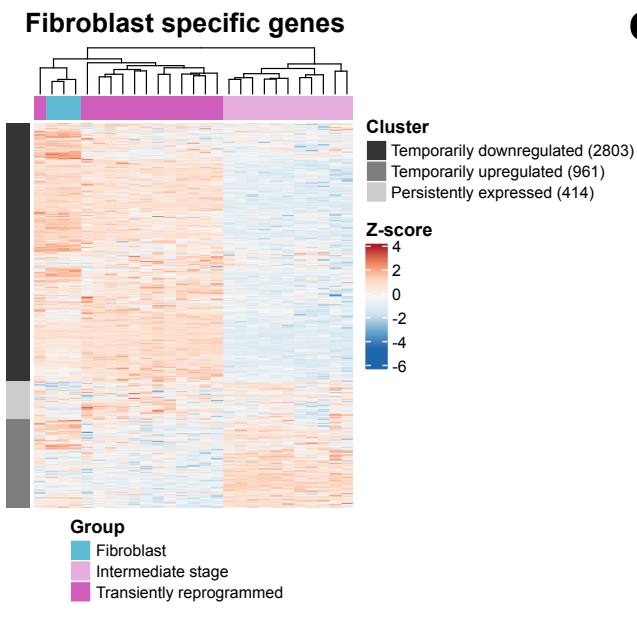**c**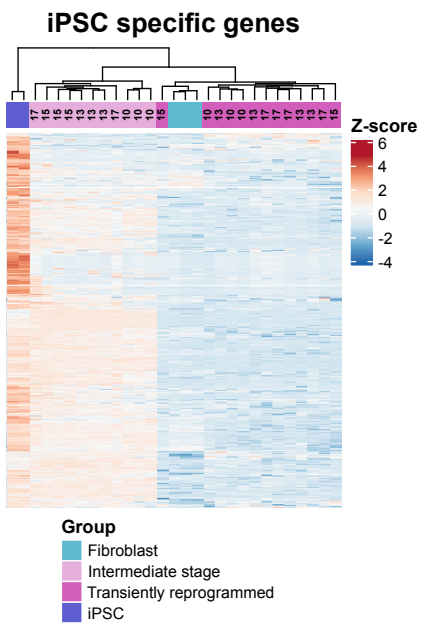**d**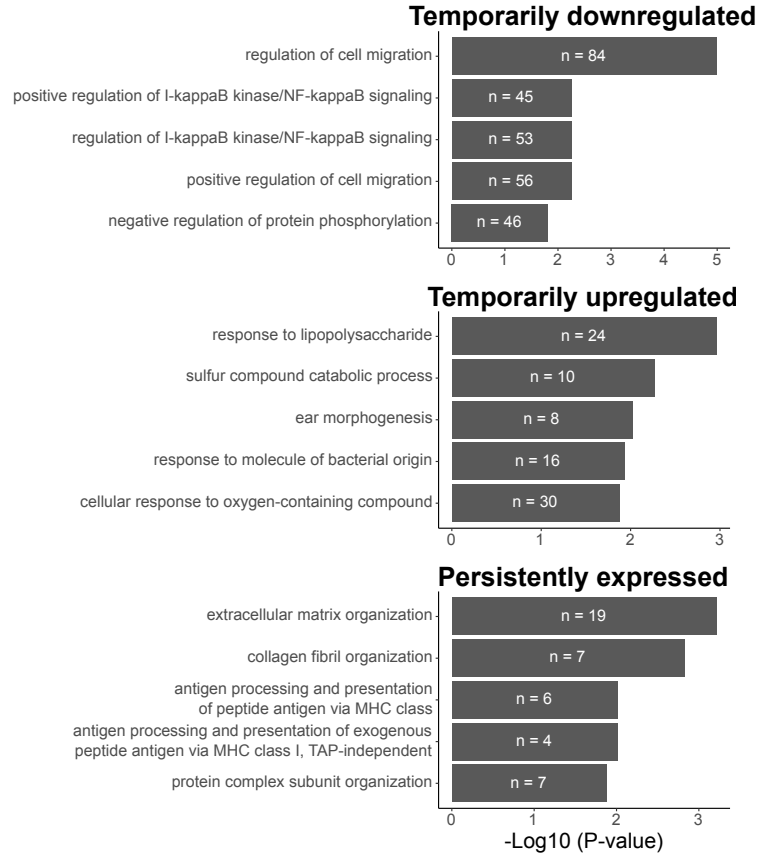**e**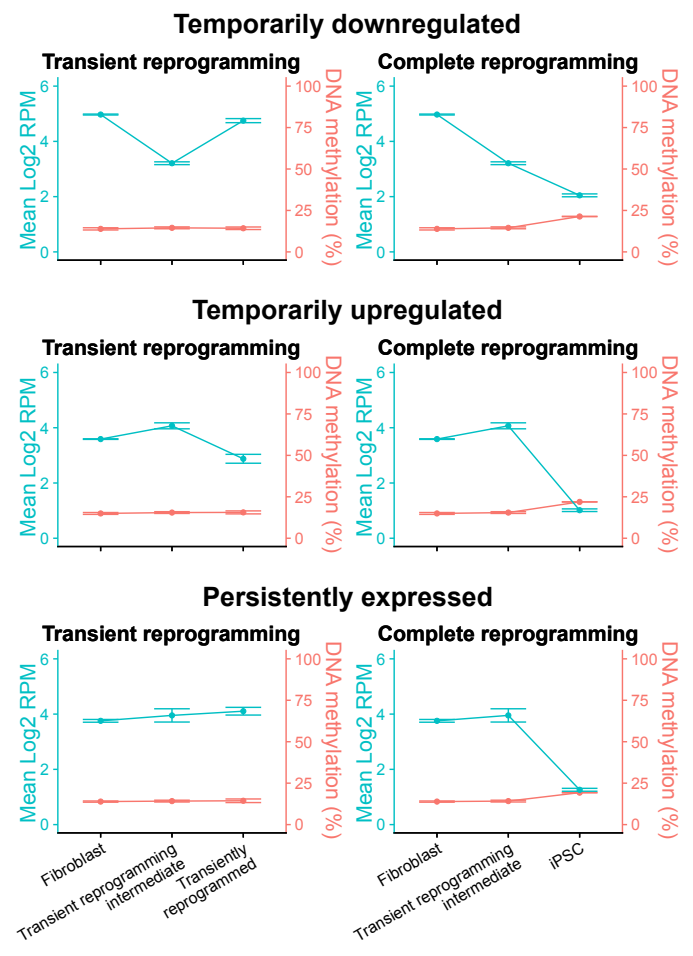**f**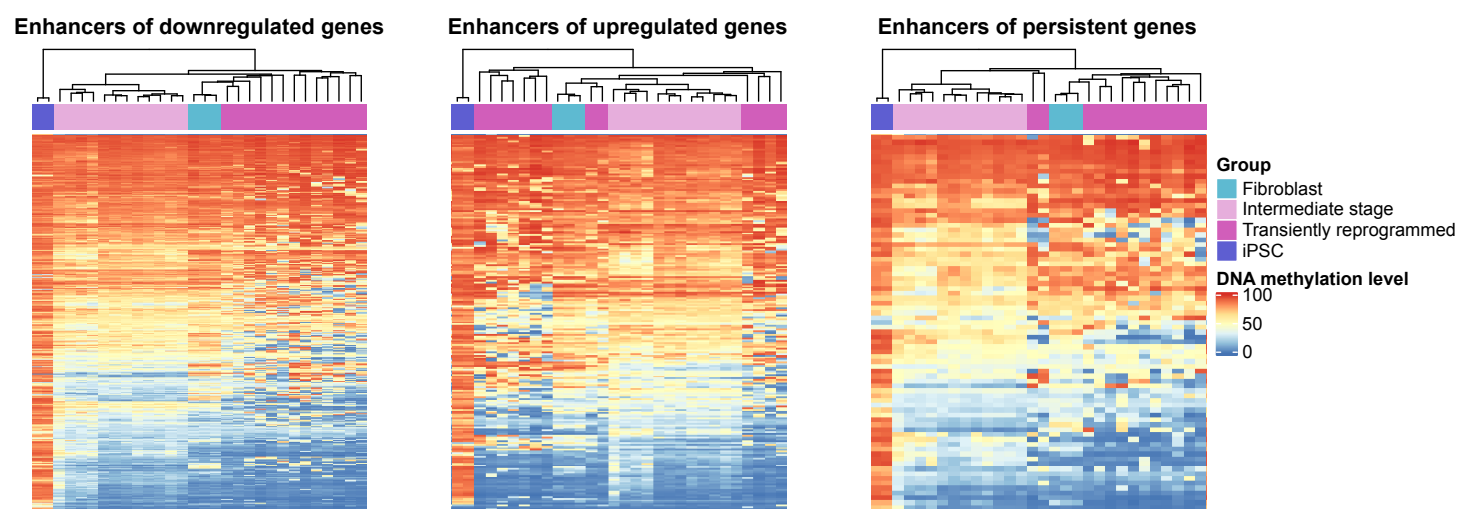

Supplement: supp [file elife-71624-supp-v1.zip › elife_poa_e71624_Figure_2_figure_supplement_1.pdf]
